## 1 **Abstract**

2 **Background:** Sensorimotor gating is a fundamental neural filtering process that allows attention  
3 to be focused on a given stimulus. Sensory gating, commonly measured using the prepulse  
4 inhibition (PPI) of the auditory startle reflex task, is impaired in patients suffering from various  
5 neurological and psychiatric disorders, including schizophrenia. Because PPI deficits are often  
6 associated with attention and cognitive impairments, they are widely used as biomarkers in pre-  
7 clinical research for anti-psychotic drug screening. Yet, the neurotransmitter systems and synaptic  
8 mechanisms underlying PPI are still not resolved, even under physiological conditions. Recent  
9 evidence ruled out the longstanding hypothesis that PPI is mediated by midbrain cholinergic inputs  
10 to the caudal pontine reticular nucleus (PnC). Instead, glutamatergic, glycinergic and GABAergic  
11 inhibitory mechanisms are now suggested to be crucial for PPI, at the PnC level. Since amygdalar  
12 dysfunctions affect PPI and are common to pathologies displaying sensorimotor gating deficits,  
13 the present study was designed to test that direct projections to the PnC originating from the  
14 amygdala, contribute to PPI.

15  
16 **Results:** Using Wild Type and transgenic mice expressing eGFP under the control of the glycine  
17 transporter type 2 promoter (GlyT2-eGFP mice), we first employed tract-tracing, morphological  
18 reconstructions and immunohistochemical analyses to demonstrate that the central nucleus of the  
19 amygdala (CeA) sends glutamatergic inputs latero-ventrally to PnC neurons, including GlyT2<sup>+</sup>  
20 cells. Then, we showed the contribution of the CeA-PnC excitatory synapses to PPI *in vivo* by  
21 demonstrating that optogenetic inhibition of this connection decreases PPI, and optogenetic  
22 activation induces partial PPI. Finally, in GlyT2-Cre mice, whole-cell recordings of GlyT2<sup>+</sup> PnC

1 neurons *in vitro* paired with optogenetic stimulation of CeA fibers, as well as photo-inhibition of  
2 GlyT2<sup>+</sup> PnC neurons *in vivo*, allowed us to implicate GlyT2<sup>+</sup> neurons in the PPI pathway.

3

4 **Conclusions:** Our results uncover a feed-forward inhibitory mechanism within the brainstem  
5 startle circuit by which amygdalar glutamatergic inputs and GlyT2<sup>+</sup> PnC neurons play a key role  
6 in mediating PPI. We are providing new insights to the clinically-relevant theoretical construct of  
7 PPI, which is disrupted in various neuropsychiatric and neurodevelopmental diseases.

8

9 **Keywords:** sensorimotor gating, electrophysiology, caudal pontine reticular nucleus, amygdala,  
10 optogenetics, startle.

11

12

13

14

15

16

17

18

19

20

21

22

23

1

## 2 **Background**

3       Sensorimotor gating is the ability of a weak sensory event to inhibit or “gate” the motor  
4 response to an intense sensory stimulus. Such as fundamental neuronal process is thought to help  
5 attention to be oriented towards a given stimulus. Currently, prepulse inhibition (PPI) of the  
6 acoustic startle reflex task remains the gold standard operational measure of sensorimotor gating  
7 [1-3], used both in humans and various animal models [2, 4]. PPI is a paradigm in which a pre-  
8 stimulus of low intensity (“prepulse”) presented ~10-500ms before a startle stimulus (“pulse”),  
9 attenuates the startle response [1-9]. PPI suppresses other, potentially interfering sensory or  
10 behavioral responses, to ensure efficient information processing. Abnormal PPI arises when a mild  
11 acoustic pre-stimulus fails to decrease the startle response. Although PPI deficits are a hallmark of  
12 schizophrenia [1, 3], they also occur in other psychiatric disorders, such as obsessive compulsive  
13 disorder [5, 6], Gilles de la Tourette syndrome [7], Huntington’s disease and post-traumatic stress  
14 disorder [8], as well as other neurological disorders such as seizure disorders and nocturnal  
15 enuresis [reviewed in ref. 12]. PPI impairments are associated with, and often predictive, of  
16 cognitive disruptions and attentional problems. In fact, hallucinations, obsessions, and  
17 compulsions are thought to emerge as a result of a deficient gating system that prevents the brain  
18 from filtering out irrelevant sensory cues, actions or thoughts [6]. At the present time, the reversal  
19 of PPI deficits in animal models and patients with schizophrenia is an efficient tool for  
20 antipsychotic drug screening. Despite this, the neuronal pathways and mechanisms underlying the  
21 PPI regulatory circuitry are still unresolved. Therefore, identifying the cell types and synaptic  
22 mechanisms involved in PPI is crucial to further our understanding of the neuronal underpinning  
23 of sensory filtering. Knowledge of the PPI-regulatory circuitry will also have clinical applications,



1 expanding our insights of the pathophysiology of disorders with PPI deficits, towards developing  
2 and screening therapeutics for these disorders.

3 The mammalian startle circuit is simple and consists of the cochlear nuclei which activate giant  
4 neurons in the caudal pontine reticular nucleus (PnC) that in turn, directly innervate cervical and  
5 spinal motor neurons (MNs) [4, 10, 11] (**Fig 1**). Previous animal and human studies have shown  
6 that inhibition of this pathway by prepulses leads to PPI [1-9]. PPI by acoustic stimuli depends on  
7 the activation of midbrain structures including the inferior and the superior colliculi, as well as the  
8 pedunculopontine tegmental nucleus (PPTg) [reviewed in ref. 12]. In addition, different cortical  
9 and subcortical areas within the corticostriatal-pallido-pontine (CSPP) circuit, regulate PPI. In fact,  
10 modulation of the prefrontal cortex, thalamus, hippocampus, basolateral amygdala, nucleus  
11 accumbens and dorsal striatum affect PPI [4, 12].

12 By receiving inputs from various sensory modalities (i.e., trigeminal, vestibular and auditory)  
13 and directly activating spinal motor neurons, PnC giant neurons function as key sensorimotor relay  
14 neurons within the primary acoustic startle circuit. These PnC giant neurons receive cholinergic  
15 inputs from the PPTg, and general lesions of the PPTg were shown to disrupt PPI [13, 14].  
16 Therefore, until recently, there was a consensus that PPI is mediated by cholinergic PPTg neurons  
17 inhibiting PnC giant neurons within the startle pathway. However, new optogenetic and  
18 chemogenetic rat studies clearly demonstrated that specific activation or inhibition of cholinergic  
19 PPTg neurons does not alter PPI [15-17]. Since the majority of neurons in the PPTg are non-  
20 cholinergic [18], it is currently suggested that PPI may be a function of GABAergic and/or  
21 glutamatergic cells in the PPTg and/or another structure, directly projecting to the PnC. In fact,  
22 fish and rodent studies have described the crucial involvement of brainstem glutamatergic,  
23 GABAergic and glycinergic inhibitory mechanisms in PPI [19-21].

1 As it is now clear that PPI does not depend on PPTg cholinergic inputs to the PnC, we wanted  
2 to know what structure, other than the PPTg, projects directly onto PnC neurons and modifies PPI.  
3 One structure particularly relevant is the central nucleus of the amygdala (CeA), since various  
4 neurological disorders showing PPI deficits also show amygdalar abnormalities. In fact, the  
5 amygdala is a region that has received considerable attention in studies of the etiology of  
6 neuropsychiatric illnesses [22], and impairment of amygdala function disrupts PPI [23-27]. We  
7 hypothesized that the CeA-to-PnC connection provides an alternative PPI pathway, independent  
8 from the PPTg mechanisms. Our hypothesis is based on *in vivo* and *in vitro* rat studies that  
9 corroborate the important role of the CeA in modulating the startle pathway. The CeA receives  
10 inputs from the auditory cortex and the central thalamus [28, 29] and sends projections to the PnC  
11 [30, 31] making it a potential PPI substrate. More precisely, tract-tracing studies in rats showed  
12 that neurons in the rostral part of the medial subdivision of the CeA directly innervate PnC giant  
13 neurons at the core of the acoustic startle circuit [31, 32]. However, in contrast to PPI where startle  
14 magnitude is *decreased* by a non-startling prepulse, early behavioral studies focused on  
15 understanding how startle magnitude is *increased* during conditioned and unconditioned states of  
16 fear, as seen both in rats [33, 34] and in humans [35]. These studies, performed in rats, show that  
17 the acoustic startle response is enhanced by electrically stimulating the amygdalobasal complex,  
18 including the CeA [33] or by injecting NMDA bilaterally in the amygdaloid complex [32]. *In vivo*  
19 electrophysiological recordings also revealed that activating the CeA/amygdaloid complex yields  
20 excitatory post-synaptic potentials and enhances the acoustic responsiveness of PnC giant neurons  
21 in rodents [32, 36].

22 It is only recently that functional imaging studies and c-Fos expression data in rats have  
23 provided strong evidence that CeA neuronal activity is increased during PPI [37]. However,

1 whether and how the CeA-to-PnC excitatory connection, specifically, contributes to PPI has never  
2 been tested. Moreover, downstream inhibitory PnC neuronal elements that could help reconcile  
3 the role of CeA excitatory projections in a functionally inhibitory pathway, remain to be identified.

4 Interestingly, glycinergic fibers and interneurons expressing the Glycine transporter type 2  
5 (GlyT2) are closely apposed to the PnC giant neurons in rodents [38, 39]. Although the role and  
6 source of activation of these GlyT2<sup>+</sup> neurons are unclear in the context of PPI, glycine  
7 neurotransmission has been shown to inhibit rat PnC giant neurons and contribute to PPI at the  
8 level of the startle-initiating Mauthner cells, within the goldfish auditory startle circuit [19, 40].

9 The present study was undertaken to test the hypothesis that glutamatergic CeA neurons  
10 contribute to PPI by sending inputs to the PnC, including GlyT2<sup>+</sup> neurons in mice. Here we used  
11 tract tracing, morphological reconstructions, neurochemical analyses and examined synaptic  
12 properties of glutamatergic CeA inputs terminating primarily onto GlyT2<sup>+</sup> PnC neurons, using  
13 transgenic GlyT2-eGFP and GlyT2-Cre mice. We validated our findings *in vivo* by specific  
14 optogenetic inhibition and activation of CeA-PnC glutamatergic synapses, as well as optogenetic  
15 inhibition of GlyT2<sup>+</sup> PnC neurons during startle and PPI testing.

16

17 **Figure 1. Neuronal circuits contributing to the acoustic startle response and PPI.** The  
18 mammalian primary acoustic startle pathway (*red pathway*) consists of primary auditory neurons  
19 that activate cochlear root and cochlear nuclei (CN), which then relay the auditory information to  
20 the giant neurons of the caudal pontine reticular nucleus (PnC) in the brainstem. PnC giant neurons  
21 then directly activate cervical and spinal motor neurons (MNs). During PPI (*dark blue pathway*),  
22 acoustic prepulses are thought to inhibit startle via the activation of the inferior (IC), superior  
23 colliculi (SC) and the pedunculopontine tegmental nucleus (PPTg). The PPI pathway is also under

1 the influence (*light blue pathway*) of midbrain and cortico-limbic structures including the  
2 basolateral amygdala (BLA), which activates the nucleus accumbens (NAcc) which in turn,  
3 inhibits the ventral pallidum (VP). Together, these PPI structures form the cortico-striato-pallido-  
4 pontine (CSPP) network. Here, we propose that CeA-PnC excitatory synapses (*dotted dark blue*  
5 *pathway within the dotted red rectangle*) regulate PPI alongside the CSPP circuit. Glut: Glutamate;  
6 Ach: Acetylcholine; Dopa: Dopamine; HPC: hippocampus; mPFC: medial prefrontal cortex; SN:  
7 substantia nigra; VTA: ventral tegmental area.

8

## 9 **Results**

### 10 **CeA glutamatergic neurons send inputs to the PnC lateroventral region in mice**

11 As previously reported in rat tracing studies [31, 32], we first confirmed that the retrograde  
12 tracer Fluoro-Gold, injected unilaterally within the mouse PnC (**Fig. 2A, B**), labeled neurons in  
13 various brain regions. The cytoarchitectural analysis of the gliotic lesion [41] (**Fig. 2, D**) showed  
14 that Fluoro-Gold was injected within the PnC, delineated by 7th nerve fibers. As expected, Fluoro-  
15 Gold labeled neurons in various regions including the caudate putamen, the intra amygdaloid  
16 division of the bed nucleus of the stria terminalis, and the lateral hypothalamus (data not shown).  
17 Fluoro-Gold also labeled neurons located in the mouse pedunclopontine tegmental area (PPTg)  
18 (**Additional file 1: Fig. S1; N=4**) and in the CeA (**Fig. 2F; N=4**). Labeled CeA cells bodies  
19 clustered near the border of the dorsomedial portion of the anterior amygdalar complex, ipsilateral  
20 to the PnC injection site.

21

22 **Figure 2. The CeA sends projections to the PnC.** (A) *Left*, Sagittal representation of the mouse  
23 brain illustrating the Fluoro-Gold injection site in the PnC (yellow circle) and the retrograde

1 labeling site in the CeA (red circle, dotted line). *Right*, Schematic of the hypothesis being tested.  
2 (B) Representative coronal PnC slice showing the extent of the Fluoro-Gold injection. The outer  
3 dotted circle indicates the fluorescent Fluoro-Gold injection halo. The inner dotted circle  
4 represents the center of the gliotic lesion, medial to the 7<sup>th</sup> cranial nerve and within the  
5 cytoarchitectural boundaries of the PnC. *Inset*: Representative image of the injection site in a  
6 coronal PnC slice, shown at lower magnification. (C) Representative Nissl-stained PnC section.  
7 The darker region surrounded by a dotted circular area indicates the gliotic lesion made by the  
8 Fluoro-Gold injection. (D) Representative image showing the Fluoro-Gold injection site in the  
9 PnC mapped to the Paxinos and Franklin Mouse Brain Atlas [42]. (E) Representative coronal  
10 section showing CeA neurons retrogradely labeled with Fluoro-Gold (cyan). (F) Higher  
11 magnification of the CeA neurons shown in (E) and retrogradely labelled with Fluoro-Gold.  
12 Representative of N=4 mice. Scale bars: (B-D) 200 $\mu$ m, (E) 500 $\mu$ m, (F) 100 $\mu$ m.

13

14 The CeA comprises an array of distinct neuronal populations, including inhibitory neurons  
15 that have been classified according to different amygdala markers [43]. The CeA also contains  
16 excitatory neurons exhibiting VGLUT2 immunoreactivity, as shown in rats [44]. Since recent  
17 evidence suggests that midbrain glutamatergic inputs targeting the pontine startle circuit are  
18 important for sensory gating in zebrafish [20, 21], we next focused on how axons from CeA  
19 excitatory neurons course within the PnC (**Fig. 3; N=4**). In mice injected with the viral vector  
20 AAV-CamKII $\alpha$ -eYFP into the CeA (**Fig. 3A**), NeuroTrace<sup>TM</sup> staining allowed us to confirm that  
21 the cell body of eYFP<sup>+</sup> CeA neurons was efficiently targeted by the viral injection (**Fig. 3B-E**).  
22 Our results show that 11.29% ( $27 \pm 13$  somata) of CeA neurons labeled with Neurotrace<sup>TM</sup> were  
23 eYFP<sup>+</sup> (N=4). Although it is often assumed that CamKII $\alpha$  is specific to excitatory cells, some

1 GABAergic projection neurons also express CamKII $\alpha$  [45]. Therefore, we also identified the  
2 neurochemical nature of the CamKII $\alpha$ -eYFP<sup>+</sup> CeA neurons (**Fig. 4A, B**) using an *in situ*  
3 hybridization assay (RNAscope). We observed that eYFP<sup>+</sup> CeA neurons express VGLUT2 (**Fig.**  
4 **4C-F**, N=3), and, as expected, these neurons were not co-labeled with a GABA antibody  
5 (**Additional file 1: Fig. S2**). In fact, within the medial CeA, almost all (83%  $\pm$  8%) eYFP<sup>+</sup> CeA  
6 neurons expressed VGLUT2. Finally, we observed that eYFP<sup>+</sup> CeA axons course predominantly  
7 ipsilaterally in PnC sections and are localized in the lateroventral portion of the PnC (**Fig. 3F**).  
8

9 **Figure 3. CeA glutamatergic projections course within the lateroventral portion of the PnC.**

10 (A) *Left*, Sagittal representation of the mouse brain illustrating the AAV-CamKII $\alpha$ -eYFP injection  
11 site targeting CeA neurons (green circle) and CeA projection fibers terminating at the level of the  
12 PnC (red circle). The dotted line illustrates the PnC level at which coronal cut sections were  
13 obtained to visualize CamKII $\alpha$ -eYFP<sup>+</sup> axons originating from the CeA. *Right*, Schematic of the  
14 hypothesis being tested. (B) Representative CeA coronal sections showing eYFP<sup>+</sup> fluorescence  
15 (green) and NeuroTrace<sup>TM</sup> staining (magenta). The white rectangle shows the area imaged in  
16 panels C-E. *Inset*, Nissl stain image of injection site in the CeA. Arrowheads represent the cannula  
17 tract. (C) White arrows indicate CeA cells positive for CamKII $\alpha$ -eYFP (green). (D) NeuroTrace<sup>TM</sup>  
18 stain (magenta) labels CeA cells bodies (white arrows) (E) White arrows indicate CeA cells  
19 positive for CamKII $\alpha$ -eYFP and NeuroTrace<sup>TM</sup>. (F) Representative image of CamKII $\alpha$ -eYFP<sup>+</sup>  
20 CeA fibers (green) coursing within a PnC coronal section stained with NeuroTrace<sup>TM</sup> (magenta).  
21 *Inset*, Representative image of a PnC slice showing the tract (arrow) of the implanted optic fiber  
22 for PPI *in vivo* experiments. Representative of N=4 mice. Scale bars: (C, E) 400 $\mu$ m, (D-F) 50 $\mu$ m.

23

1 **Figure 4. CeA neurons targeted with the AAV-CamKII $\alpha$ -eYFP viral injection are VGLUT2<sup>+</sup>.**

2 (A) Schematic of the hypothesis being tested. (B) Representative image of a CeA coronal section  
3 at low magnification, hybridized with eYFP (magenta) and VGLUT2 (green) probes. White  
4 rectangle shows area imaged in panels C-F. (C-F) Arrowheads indicate CamKII $\alpha$ -eYFP<sup>+</sup> CeA  
5 neurons co-expressing VGLUT2 mRNA. Representative of N=3 mice. Scale bars: (B) 500  $\mu$ m,  
6 (C-F) 25  $\mu$ m.

7  
8 **Optogenetic inhibition of CeA-PnC excitatory synapses during acoustic prepulses decreases**  
9 **PPI**

10 Following our histological analyses, we assessed the potential role of the CeA-PnC  
11 excitatory connection during PPI, *in vivo*. We anticipated that silencing amygdala neurons that  
12 regulate PPI would not affect baseline startle in the absence of a prepulse. To silence CeA-PnC  
13 excitatory synapses, we used WT mice injected with the optogenetic viral vector  
14 rAAVDJ/CamKII $\alpha$ -eArch3.0-eYFP to transduce CeA excitatory cells with Archaeorhodopsin-3  
15 (Arch3.0). We tested non-injected mice (control) and mice injected with the control  
16 rAAVDJ/CamKII $\alpha$ -eYFP for comparison. Following the unilateral intracranial injection, an optic  
17 fiber was implanted at the level of the PnC, to optically inhibit CeA fibers/terminals expressing  
18 Arch3.0 (**Fig. 5A, left**).

19 To test our hypothesis that silencing CeA-PnC excitatory synapses does not affect baseline  
20 startle elicited by a pulse alone stimulation (“pulse”), we photo-inhibited CeA-PnC excitatory  
21 synapses prior to and concurrent with the acoustic stimulation at increasing sound levels, and then,  
22 we measured the startle response as a readout (**Fig. 5A, middle**). In all mice, sound intensities of  
23 and beyond 90 dB led to a measurable acoustic startle reflex, characterized by a whole-body flexor

1 muscle contraction [2, 10, 11]. We found no differences when we compared the startle amplitude  
2 obtained with and without photo-inhibition of CeA-PnC excitatory synapses from eArch3.0-  
3 expressing animals to animals injected with the control virus and non-injected controls (**Fig. 5B**).  
4 These results, which were replicated in mice injected with Halorhodopsin (pAAV DJ-CamKIIa-  
5 NpHR3.0-eYFP; **Additional file 1: Fig. S3A-B**), confirm that inhibiting CeA-PnC excitatory  
6 synapses prior to and during a startle stimulation does not affect baseline startle. Our observations  
7 are consistent with previous rat studies demonstrating that lesions of the CeA do not block the  
8 acoustic startle response itself [46].

9 We then tested whether silencing CeA-PnC excitatory synapses affects PPI trials. To do  
10 so, the photo-inhibition started with prepulse onset, and lasted until the end of the inter-stimulus  
11 intervals (ISIs) between prepulse and pulse (**Fig. 5A, right**) [15-17, 20]. Although photo-  
12 inhibition had no impact on pulse-alone stimulations interspersed with PPI trials (**Fig. 5C**), photo-  
13 inhibition of CeA-PnC excitatory connection during the prepulse significantly decreased PPI by  
14 25-43% at ISI between 30ms-300ms in eArch3.0-expressing animals, but not in the control animals  
15 (**Fig. 5D**). Similarly, in mice injected with Halorhodopsin, photo-inhibition significantly decreased  
16 PPI by 16-29% when the prepulse was presented 50-300ms before the startling pulse (**Additional**  
17 **file 1: Fig. S3C**), without altering startle magnitude in pulse-alone trials (**Additional file 1: Fig.**  
18 **S3A-B**). Since silencing the CeA-PnC excitatory connection during the prepulse and the  
19 subsequent ISI led to a decrease in PPI, these results support our hypothesis that CeA excitatory  
20 neurons regulate part of the behavioral PPI.

21

22 **Figure 5. Silencing CeA-PnC excitatory projections during acoustic prepulses decreases PPI.**

23 (A) Schematic of acoustic startle reflex and PPI protocols performed using non injected WT  
24 control mice, mice injected with eYFP only (light ON or OFF) and mice injected with



1 Archaelhodopsin (Arch3.0; light ON or OFF). The rightmost schematic represents the hypothesis  
2 being tested. (B) Graph showing no significant effect of green light paired with 70dB-120dB  
3 acoustic startling pulses on basal startle amplitude among animal groups [mouse group:  
4 ( $F_{(1,11)}=1.417$ ,  $p=0.268$ ); light: ( $F_{(1)}=0.00155$ ,  $p=0.969$ ); sound intensity\*light interaction:  
5 ( $F_{(1,6)}=0.206$ ,  $p=0.974$ )]. (C) Graph showing no significant main effect of light during 120dB  
6 pulses presented before (basal) vs. randomly during the PPI task, on mean baseline startle  
7 amplitude among animal groups ( $F_{(1)}=3.124$ ,  $p=0.105$ ). (D) Graph showing that green light paired  
8 with acoustic prepulses significantly decreased PPI only in mice injected with Arch3.0, at ISIs  
9 between 30 and 300ms. We found a significant effect of ISI ( $F_{(1,7)}=24.863$ ,  $p<0.001$ ), light:  
10 ( $F_{(1)}=10.201$ ,  $p=0.009$ ), and light\*ISI interaction: ( $F_{(1,7)}=4.057$ ,  $p<0.001$ ) on PPI (Two-way RM  
11 ANOVA). N=8 mice per group. Data are represented as mean  $\pm$  SEM. \* $p<0.05$ , \*\* $p<0.01$ .

12  
13 Next, we tested whether photo-activation of CeA-PnC excitatory synapses prior to a pulse-  
14 alone stimulation could mimic the effect of an acoustic prepulse and lead to PPI (**Fig. 6A**). To test  
15 this, control mice injected with eYFP only were used to test for a possible light-induced heat effect.  
16 These mice were compared to WT mice injected with the optogenetic AAV vector rAAVDJ-  
17 CamKII $\alpha$ -ChR2-eYFP in the CeA. In all mice, CeA-PnC excitatory synapses were photo-activated  
18 shortly prior to a startling pulse, at intervals used for PPI. As shown in Figure 6B, activating this  
19 connection with blue light pulses at 5Hz or 20Hz produced a PPI effect across different ISI  
20 (between photo-activation and acoustic pulses) only in WT mice injected with ChR2. Interestingly,  
21 the 20Hz photo-activation tended to be more efficient than the 5Hz photo-stimulation train  
22 (ISI=50ms,  $q=4.376$ ,  $p=0.007$ ), yielding PPI values 18-41% of PPI elicited by the acoustic  
23 prepulse. Overall, the light-induced PPI effect was smaller than PPI induced by an acoustic

1 prepulse, which resulted in a 35-60% PPI. Importantly, our results confirm that CeA excitatory  
2 neurons sending inputs to the PnC contribute to PPI, during the interval between the prepulse and  
3 the pulse.

4

5 **Figure 6. Photo-stimulation of CeA-PnC excitatory synapses induces PPI.** (A) Representation  
6 of the PPI protocols performed using acoustic prepulses (*top*) or blue light prepulses (*middle*). The  
7 *bottom* schematic represents the hypothesis being tested. (B) PPI was assessed using acoustic  
8 prepulses (black bars) or brief optogenetic stimulation of CeA-PnC glutamatergic synapses at 5Hz  
9 (red bars) and 20Hz (dark blue bars) in WT mice injected with Chr2-eYFP and control mice  
10 injected with eYFP only (white and grey bars) used to test for a possible light-induced heat effect.  
11 Graph showing that optogenetic stimulation elicited PPI values (i.e., 18-41% of acoustic prepulse)  
12 lower than PPI values obtained using acoustic prepulses, at ISI between 10-500ms. N=8 mice per  
13 group; ANOVA ( $F_{(1,14)}=6.152$ ,  $p<0.001$ ).

14

15 Finally, we tested whether photo-stimulation of CeA-PnC excitatory synapses (at 20 Hz)  
16 enhances the effect of the acoustic prepulse and potentiates PPI. Therefore, we paired the photo-  
17 stimulation with pulse-alone stimulations or with acoustic prepulses during PPI trials, using mice  
18 injected with AAV-CamKII $\alpha$ -Chr2-eYFP (**Additional file 1: Fig. S4**; N=6). Photo-stimulation  
19 did not alter startle responses (**Additional file 1: Fig. S4A**;  $p>0.05$ ) or PPI (**Additional file 1: Fig.**  
20 **S4B**;  $p>0.05$ ). Based on our results, we conclude that CeA-PnC excitatory synapses are maximally  
21 activated in response to acoustic prepulses *in vivo*, and that additional photo-stimulation of CeA-  
22 PnC excitatory inputs during acoustic prepulses does not further enhance PPI.

23

## 1 **CeA glutamatergic neurons send inputs to PnC inhibitory neurons**

2           We next aimed to reconcile the glutamatergic nature of CeA-PnC inputs and their role in a  
3 functionally inhibitory pathway. Since glycinergic neurons are in the PnC and in close proximity  
4 of PnC giant neurons, we hypothesized that CeA excitatory inputs activate glycinergic PnC  
5 neurons, contributing to the inhibitory component of the PPI phenomenon. To test our hypothesis,  
6 we injected the AAV viral vector AAVDJ-CamKII $\alpha$ -mCherry into the CeA of transgenic mice  
7 expressing eGFP under the control of the glycine transporter 2 (GlyT2) promoter [39]. Orthogonal  
8 imaging and morphological reconstruction analyses revealed close putative synaptic appositions  
9 between CamKII $\alpha$ -mCherry<sup>+</sup> CeA projections and GlyT2<sup>+</sup> PnC neurons (**Fig. 7A-C; N=6**). In  
10 addition, PSD-95, a post-synaptic protein at excitatory synapses, co-localized with these  
11 appositions confirming that CamKII $\alpha$ -mCherry<sup>+</sup> CeA fibers form excitatory synapses with GlyT2<sup>+</sup>  
12 PnC neurons (**Fig. 7C**).

13  
14 **Figure 7. CamKII $\alpha$ <sup>+</sup> CeA fibers closely apposed to GlyT2<sup>+</sup> PnC neurons.** (A) *Top*, Schematic  
15 of the hypothesis being tested. *Bottom*, Orthogonal view of a close apposition between CamKII $\alpha$ -  
16 mCherry<sup>+</sup> CeA excitatory fibers (magenta) and the soma of a GlyT2<sup>+</sup> PnC neuron (green) indicated  
17 by the arrowhead in all three views. (B) Three-dimensional reconstruction of putative synaptic  
18 contacts between CamKII $\alpha$ -mCherry<sup>+</sup> CeA fibers (magenta) and GlyT2-eGFP<sup>+</sup> neurons expressing  
19 PSD-95 (blue; arrow). Some putative synaptic appositions did not show PSD-95 staining  
20 (arrowheads). (C) Volume rendering and angular sectioning of the PSD-95<sup>+</sup> putative synaptic  
21 contact shown in B. Scale bar in (A) is 50 $\mu$ m.

22

1           Next, we recorded basic electrical properties of CamKII $\alpha$ -eYFP<sup>+</sup> CeA neurons expressing  
2 ChR2 while confirming their sensitivity to blue light photo-stimulation. For this, *in vitro* patch  
3 clamp recordings were performed in acute CeA slices of mice expressing the Cre-recombinase  
4 enzyme in GlyT2<sup>+</sup> neurons (i.e., GlyT2-Cre mice). These GlyT2-Cre mice were previously  
5 injected with the AAVDJ-CamKII $\alpha$ -ChR2-eYFP viral vector in the CeA and a Cre-dependent  
6 tdTomato viral vector in the PnC, to transduce CeA excitatory cells with ChR2 and GlyT2<sup>+</sup> PnC  
7 neurons with tdTomato, respectively (**Fig. 8A and Additional file 1: Fig. S5A**). Spontaneous  
8 excitatory post-synaptic currents (sEPSC) with a mean amplitude of  $13.26 \pm 0.1$  pA were recorded  
9 in CamKII $\alpha$ -eYFP<sup>+</sup> CeA neurons held at -70mV, and current injections elicited action potentials  
10 firing at a maximum rate of  $14.6 \pm 5.4$  Hz (**Additional file 1: Fig. S5C**). More importantly, photo-  
11 stimulation induced large current responses ( $821.15 \pm 20.3$ pA maximum amplitude), indicating  
12 that our stimulation protocol successfully activated CamKII $\alpha$ -eYFP<sup>+</sup> CeA neurons expressing  
13 ChR2 (**Additional file 1: Fig. S5D**).

14           We then used acute PnC slices obtained from the same mice to determine whether photo-  
15 stimulation of CeA excitatory fibers could elicit excitatory synaptic responses in GlyT2<sup>+</sup> PnC  
16 neurons (**Fig. 8A**). Photo-stimulation (i.e., blue light pulses) evoked excitatory post-synaptic  
17 potentials (EPSPs) and currents (EPSCs) in td-Tomato-expressing GlyT2<sup>+</sup> neurons held at -70mV.  
18 These excitatory responses showed facilitation at ISI of 50 and 100ms (**Fig. 8B**, EPSP PPR:  
19 50ms=1.09, 100ms=1.13; EPSC PPR: 50ms=1.318, 100ms=1.243). Then, we applied glutamate  
20 receptor antagonists to functionally identify the post-synaptic receptors underlying the EPSPs  
21 ( $2.39 \pm 0.47$ mV) elicited in GlyT2<sup>+</sup> PnC neurons, in response to the CeA fibers photo-stimulation.  
22 AP5 (50 $\mu$ M) eliminated the NMDAR-dependent component of the EPSP (AP5:  $0.68 \pm 0.17$ mV; 1-  
23 way RM ANOVA,  $F=9.463$ ,  $p<0.01$ ) and DNQX (20 $\mu$ M) blocked the (AMPA)-dependent

1 component (**Fig. 8C**; DNQX:  $0.75 \pm 0.17\text{mV}$ ; 1-way RM ANOVA,  $F=6.009$ ,  $p<0.01$ ) which  
2 recovered by washing out the drugs ( $2.15 \pm 0.75\text{mV}$ ; **Fig. 8C**).

3

4 **Fig 8. CeA glutamatergic inputs activate GlyT2<sup>+</sup> PnC neurons via AMPA and NMDA**

5 **receptors.** (A) *Top*, Injection of AAVDJ-CamKII $\alpha$ -ChR2-eYFP in the CeA and injection of Cre-

6 dependent AAVDJ-tdTomato in the PnC of GlyT2-Cre mice, followed by *in vitro* patch clamp

7 recordings. *Bottom*, Schematic of the hypothesis being tested. (B) Paired-pulse ratios of the light-

8 evoked EPSPs (*Top*) and EPSCs (*Bottom*) at 50 and 100ms interstimulus intervals (ISIs). *Insets*:

9 Representative traces. (C) Graph showing the amplitude of the light-evoked EPSPs recorded in

10 GlyT2<sup>+</sup> PnC neurons in control, during the sequential bath-application of AP5 and DNQX and

11 following washout. *Insets*: Sample traces. Scale: 10mV/15ms. Representative of N=10 mice, n=38

12 neurons. Data are represented as mean  $\pm$  SEM. \* $P>0.05$ , \*\* $P>0.01$ . Scale bars: (B) Voltage traces:

13 2mV/10ms; Current traces: 5pA/5ms

14

15 Next, to determine if the electrical properties of GlyT2<sup>+</sup> PnC neurons targeted by CeA

16 excitatory inputs differ from neighboring untargeted GlyT2<sup>+</sup> PnC cells (**Fig. 9A**), we compared

17 the intrinsic and spontaneous synaptic properties of tdTomato-expressing GlyT2<sup>+</sup> neurons

18 (**Additional file 1: Fig. S6 and Table S1**) responsive to light vs. tdTomato-expressing GlyT2<sup>+</sup>

19 neurons unresponsive to light, at -70 mV. Their anatomical location was confirmed post-recording

20 using GlyT2 and Biocytin co-immunostaining, followed by a 3D reconstruction (**Fig. 9B-C**). As

21 expected from our tract-tracing results, GlyT2<sup>+</sup> cells medial to 7n (n=6) and cells located

22 lateroventrally were responsive to blue light (n=12; **Fig. 9B-C**) whereas cells located along the

23 midline (n=16) or contralateral to the injection site (n=4) did not respond to light (not shown). The

1 EPSPs and EPSCs recorded at -70 mV were abolished at 0 mV (i.e., the EPSP reversal potential).  
2 None of the light-responsive cells showed IPSP or IPSCs at 0 mV, confirming that no inhibitory  
3 inputs were activated by blue light (n=12; **Fig. 9D**). While both cell types displayed similar passive  
4 and active membrane properties (**Additional file 1: Fig. S7**) (F=1.119, p=0.327; **Additional file**  
5 **1: Fig. S6C**) and received spontaneous excitatory and inhibitory inputs, the amplitude of sEPSCs  
6 (n=18, t=2.538, p=0.011) and sIPSCs (t=2.434, p=0.025) of GlyT2<sup>+</sup> responsive cells was greater  
7 compared to that of GlyT2<sup>+</sup> unresponsive cells (n=20; **Additional file 1: Fig. S6-B**).

8  
9 **Figure 9. Electrophysiological properties of GlyT2<sup>+</sup> PnC neurons.** (A) Schematic of the  
10 hypothesis being tested. (B) Representative PnC slice showing eGFP<sup>+</sup> fluorescence (magenta) and  
11 Biocytin staining (cyan). (C) Higher magnification of the box area in (A), showing representative  
12 morphological reconstructions of recorded GlyT2<sup>+</sup> cell bodies filled with biocytin. (D)  
13 Representative light-evoked voltage (top two traces) and current traces (bottom two traces)  
14 recorded at 0mV (left) and -70mV (right) of a GlyT2<sup>+</sup> neuron responsive to blue light. Blue  
15 arrowheads and lines indicate blue-light photo-stimulation. Scale bars: (B) 250 μm. (C) 10 μm.  
16 (D) Voltage traces: 1mV/10ms; Current traces: 5pA/1ms.

17  
18 Results of these electrophysiological experiments confirm our anatomical data showing  
19 that CeA glutamatergic projections activate a subset of GlyT2<sup>+</sup> PnC neurons located latero-  
20 ventrally, via AMPA and NMDA receptors. Spontaneous IPSCs were recorded in GlyT2<sup>+</sup> PnC  
21 neurons held at 0mV (EPSP reversal potential), confirming that these neurons receive inhibitory  
22 inputs. However, since blue light photo-stimulation failed to evoke IPSPs in GlyT2<sup>+</sup> PnC neurons,

1 these results confirm that  $\text{CamKII}\alpha^+$  CeA neurons do not send inhibitory projections to  $\text{GlyT2}^+$   
2 PnC neurons.

3

#### 4 **Optogenetic inhibition of $\text{GlyT2}^+$ PnC neurons during acoustic prepulses decreases PPI**

5 Finally, to test whether  $\text{GlyT2}^+$  PnC neurons (likely activated by CeA inputs) contribute to  
6 PPI (**Fig. 10A**), we studied the behavioral contribution of  $\text{GlyT2}^+$  PnC neurons, using  $\text{GlyT2-Cre}$   
7 mice (N = 8 mice) injected with the Cre-dependent optogenetic viral vector rAAVDJ/Ef1 $\alpha$ -DIO-  
8 eArch3.0-eYFP to transduce  $\text{GlyT2}^+$  PnC neurons with Archaelhodopsin-3 (Arch3.0). We  
9 optogenetically inhibited these neurons during PPI through unilateral optic fibers, chronically  
10 implanted in the PnC. Photo-inhibition of  $\text{GlyT2}^+$  PnC neurons using 1ms pulses of green light  
11 stimulation presented at 5Hz had no impact on the acoustic startle response (**Fig. 10B**) or pulse-  
12 alone stimulations interspersed with PPI trials (**Fig. 10C**). However, photo-inhibition of  $\text{GlyT2}^+$   
13 PnC neurons during the prepulse significantly decreased PPI by 37%-40% at ISI between 30ms-  
14 100ms (**Fig. 10D**).

15

#### 16 **Figure 10. Silencing $\text{GlyT2}^+$ PnC neurons during acoustic prepulses decreases PPI.** (A)

17 Schematic of the hypothesis being tested in  $\text{GlyT2-Cre}$  mice injected with a Cre-dependent AAV  
18 encoding Archaelhodopsin-eYFP (Arch3.0-eYFP). (B) Graph showing no significant effect of  
19 green light paired with 70dB-120dB acoustic startling pulses on basal startle amplitude [light:  
20 ( $F_{(1,7)}=1.407$ ,  $p=0.274$ ); intensity\*light interaction:( $F_{(3,21)}=1.747$ ,  $p=0.188$ )]. (C) Graph showing  
21 no significant main effect of light during 120dB pulses presented before (basal) vs. randomly  
22 during the PPI task, on mean baseline startle amplitude ( $F_{(1)}=3.124$ ,  $p=0.105$ ). (D) Graph showing  
23 that green light paired with acoustic prepulses significantly decreased PPI in mice injected with

1 Arch3.0, at ISIs between 30 and 100ms. We found a significant effect of ISI ( $F_{(6,42)}=8.957$ ,  
2  $p<0.001$ ), and light ( $F_{(1,7)}=8.216$ ,  $p=0.024$ ). (Two-way RM ANOVA). N=8 mice per group. Data  
3 are represented as mean  $\pm$  SEM. \* $p<0.05$ , \*\* $p<0.01$ .

4

## 5 **Discussion**

6 Overall, our results confirm that in mice, the PnC receives CeA glutamatergic projections which  
7 course predominantly ipsilaterally, within the ventrolateral portion of the PnC. Since photo-  
8 activating these excitatory projections at the level of the PnC induced a partial PPI and photo-  
9 silencing this connection produced an ISI-dependent reduction in PPI, this suggests that CeA  
10 glutamatergic inputs contribute to PPI. We also found that the GlyT2<sup>+</sup> PnC neurons responsive to  
11 the photo-stimulation of CeA glutamatergic inputs display AMPA and NMDA receptor-dependent  
12 excitatory responses. Finally, our results show that silencing GlyT2<sup>+</sup> PnC neurons decreases PPI.  
13 Together, the influence of CeA glutamatergic neurons in PPI and their direct input to GlyT2<sup>+</sup>  
14 neurons, located at the core of the PnC startle circuit, strongly argue that CeA glutamatergic  
15 neurons and GlyT2<sup>+</sup> neurons are an intrinsic part of the neuronal mechanism underlying the  
16 prepulse inhibition of the startle response.

17

## 18 **Anatomical studies**

19 Our data confirm that in mice, there is a direct pathway originating from the CeA onto the  
20 pontine reticular formation, as previously described in rats, cats, guinea pigs and monkeys [44, 47-  
21 51]. Our retrograde tracing experiments revealed that afferent projections to the PnC originate in  
22 various brain regions including the PPTg and the CeA (**Fig. 2 and Additional file 1: Fig. S1**).  
23 Recent evidence in rats and fish suggest that glutamatergic (and likely also, GABAergic cells), but



1 *not* cholinergic neurons, in the PPTg are essential for inhibiting the startle response, during PPI  
2 [15-17, 20, 21]. Here, we focused on the glutamatergic projections from the CeA because this  
3 region was found to be both relevant for the modulation of the acoustic startle response [32-34]  
4 and relevant to diseases associated with sensory gating deficits [37]. In rats, while PnC-projecting  
5 CeA neurons were shown to be able to enhance startle reactivity of PnC giant neurons,  
6 immunohistochemical assays revealed their non-GABAergic nature [52]. In contrast to the well  
7 described CeA inhibitory neuronal populations [43], very few immunohistochemical studies have  
8 investigated the population of CeA neurons expressing the glutamatergic neuronal marker  
9 VGLUT2<sup>+</sup>, which directly project to pontine neurons. Fung et al. (2011) reported that 24% of all  
10 retrogradely-labeled CeA neurons that project directly to the oral pontine reticular nuclei (PnO;  
11 rostral to the PnC) are VGLUT2<sup>+</sup> and are located in the lateral and capsular subdivisions of the  
12 CeA. Although the studies of Fung et al (2011) were conducted in guinea pigs, our anatomical data  
13 obtained in mice are similar: that is, our CamKII $\alpha$ -driven tract-tracing analysis and *in situ*  
14 hybridization results (**Figs. 3 and 4**) also confirm that 80% of the CamKII<sup>+</sup> CeA neurons virally  
15 targeted, are glutamatergic and project to the PnC. Interestingly, we demonstrate that amygdalar  
16 cell bodies sending projections to the PnC are confined to the medial CeA; and no cell bodies in  
17 the lateral and capsular CeA were detected.

18 Our anterograde tracing experiments and histological analyses also show that the descending  
19 CeA glutamatergic fibers course into the ventro-lateral part of the PnC, adjacent to the 7th nerve  
20 fibers and the olivary complex, in mice (**Fig. 3F**). Our findings are in accordance with the results  
21 of previous anatomical studies in rats and cats showing that descending CeA projecting neurons  
22 innervate, directly, with ipsilateral predominance, neurons in the PnC [47-51]. The lateroventral  
23 PnC is innervated by cochlear nuclei fibers conveying acoustic startle input to PnC neurons, as

1 lesions in the lateroventral PnC greatly attenuate the startle reflex [10, 11, 53]. Altogether these  
2 findings confirm that the CeA projects to a region in the PnC essential for acoustic startle  
3 processing.

4 Interestingly, previous analysis had shown that CeA terminal fibers were only occasionally  
5 seen close to the *dendrites* of PnC giant neurons responsible for the startle response [25], in  
6 contrast to projections from the cochlear nucleus, which terminate on the *somata* and proximal  
7 dendrites of these PnC giant neurons [54; Zaman et al., 2017]. Rather, such CeA fibers mainly  
8 terminated close to the *somata* of small and medium-sized neurons of the PnC, whose chemical  
9 phenotype was not identified [32]. The small diameter (10-20um) GlyT2<sup>+</sup> PnC neurons we focused  
10 on in the present study seem to fit that description [36,39].

11 Morphological analyses performed in mice expressing eGFP in GlyT2<sup>+</sup> glycinergic neurons  
12 revealed that most of these small diameter neurons are in the brainstem, intermingled with giant  
13 neurons in the PnC and the PnO [38, 39]. Notably, the projections of these GlyT2<sup>+</sup> PnC neurons  
14 are distributed similarly in the thalamus of mice and man [55]. Previous experiments in rat brain  
15 slices showed that PnC glycinergic interneurons are not activated by the stimulation of afferent  
16 sensory fibers within the primary startle pathway [40]. Instead, it was suggested that glycinergic  
17 interneurons and glycinergic fibers present within the PnC are most likely under the control of  
18 excitatory and inhibitory projections from the midbrain and higher brain structures that modulate  
19 the startle responses. Here, our morphological reconstruction data (**Fig. 7**) provide evidence that  
20 the amygdala is one of the brain regions that can activate GlyT2<sup>+</sup> PnC neurons. Since PnC giant  
21 neurons in rodents [40, 56] and humans [57] strongly express glycine receptors, we speculate that  
22 once activated by the CeA, GlyT2<sup>+</sup> neurons reduce the excitability of downstream neurons  
23 important for PPI including (but not restricted to) giant PnC neurons.

1

## 2 **Behavioral studies**

3 The acoustic startle response can be modulated in various ways. In our current study, the  
4 acoustic startle response is *decreased* by a non-startling stimulus preceding the startle stimulus,  
5 resulting in a PPI effect. To better understand the different mechanisms involved in modulating  
6 the acoustic startle response, it is important to characterize the inputs to PnC neurons at the core  
7 of the primary startle pathway and their sensorimotor effects. Recently, functional imaging studies  
8 and c-Fos expression data in rats provided strong evidence that CeA neuronal activity is increased  
9 during PPI [37]. The objective of our behavioral experiments was to demonstrate the contribution  
10 of an CeA-PnC excitatory pathway in reducing the acoustic startle reflex, and its relevance to PPI.  
11 We hypothesized that if CeA inputs to the PnC modulate startle during PPI, they would need to be  
12 activated *prior* to a startle response. We validated our hypothesis *in vivo* and we showed that  
13 unilateral [11, 58-61] photo-inhibition of the CeA-PnC glutamatergic connection during the  
14 interval between the prepulse and the pulse decreases PPI (**Fig. 5**). Interestingly, photo-inhibition  
15 of the CeA-PnC glutamatergic connection did not modify an ongoing startle response elicited by  
16 a pulse alone startling stimulation (i.e., in the absence of a prepulse). Thus, our data suggest that  
17 in the context of PPI, silencing CeA glutamatergic neurons during ISIs between 30-300ms reduces  
18 PPI.

19 During conditioned and unconditioned states of fear, CeA stimulation can *amplify* the acoustic  
20 startle response [33-35]. Interestingly, our results showing the role of the CeA during PPI are  
21 consistent with the modulatory role of the CeA in fear studies demonstrating that lesions of the  
22 CeA block fear *potentiation* of startle without blocking the acoustic startle response itself [46].

1 In an attempt to mimic an acoustic prepulse and further demonstrate the behavioral relevance  
2 of this pathway, we photo-activated CeA-PnC glutamatergic connection prior to an acoustic  
3 startling stimulation (**Fig. 6**). This led to a lower “PPI-like” effect than using an acoustic prepulse.  
4 The fact that photo-activation of CeA glutamatergic fibers partially mirrored the effects of acoustic  
5 prepulses suggest that CeA excitatory inputs to the PnC do not regulate PPI alone, but work  
6 alongside other neuronal elements and pathways, including PPTg-dependent mechanisms. It  
7 should also be mentioned that, under physiological conditions, CeA neuronal firing might not  
8 necessarily follow the stimulation frequency we used. Despite this, our results clearly show that  
9 CeA-PnC excitatory inputs contribute to PPI. Another concern is the possibility that optogenetic  
10 inhibition at presynaptic terminals produces unwanted technical effects including a paradoxical  
11 increase in neurotransmitter release. To avoid this possibility, we used precisely timed, repetitive  
12 light stimulation instead of sustained archaerhodopsin and halorhodopsin activation, which  
13 previously led to an increase in spontaneous release [62], allowing us to investigate *in vivo*  
14 physiological conditions more closely.

15 Aside from their role in fear-potentiated startle, no study has directly investigated the function  
16 of CeA glutamatergic neurons projecting to the PnC, including GlyT2<sup>+</sup> neurons. At the level of the  
17 PnO, CeA glutamatergic descending projections were suggested to contribute to rapid eye  
18 movement (REM)/ active sleep by activating large (i.e., cell body of ~30um), presumably  
19 glutamatergic “REM-on” giant neurons [63]. Since CeA glutamatergic projections target both  
20 giant neurons [32] and GlyT2<sup>+</sup> neurons (present study) in the PnC as well as giant neurons in the  
21 PnO [63], it is likely that these projections also target GlyT2<sup>+</sup> neurons in the PnO. Interestingly,  
22 the activation of these two reticular cell types (i.e., giant neurons and GlyT2<sup>+</sup> cells) leads to  
23 opposite behavioral outcomes. That is, in the PnO, giant neurons contribute to REM sleep and

1 GlyT2<sup>+</sup> neurons are crucial for awake cortical activity [55]. In the PnC, giant neurons are  
2 responsible for startle responses [36], and GlyT2<sup>+</sup> neurons are crucial for behavioral arrest [55].  
3 Our data show that silencing GlyT2<sup>+</sup> neurons significantly reduced PPI at short interstimulus  
4 intervals between the prepulse and the pulse. Based on our data and that of other groups, GlyT2<sup>+</sup>  
5 PnC neurons activated by CeA glutamatergic neurons are likely the ones that inhibit startle during  
6 PPI. Future experiments should be done to identify the post-synaptic targets of GlyT2<sup>+</sup> PnC  
7 neurons that are involved in PPI. The amygdala, including the CeA comprises a wide array of  
8 molecularly, electrophysiologically, and functionally distinct cell populations (McCullough et al.,  
9 2018) that were shown to play differential roles in fear and extinction learning. Therefore, it is  
10 possible that a subset of CeA glutamatergic neurons activates a group of lateroventral GlyT2<sup>+</sup> PnC  
11 neurons, leading to PPI, whereas another subset of CeA glutamatergic neurons activates giant PnC  
12 neurons, leading to enhanced fear (see schematic of Fig. 7A). These different populations of CeA  
13 glutamatergic neurons would likely be activated by inputs from the fear circuit afferent pathways  
14 (eg., Hartley et al., 2019) or the PPI circuit afferent pathways.

15 Amygdalar dysfunctions alter PPI, and both amygdalar function and PPI are abnormal in  
16 schizophrenia and other neurological diseases [1, 3, 12, 22, 26, 64-66]. In fact, the CeA also  
17 contributes to latent inhibition, a schizophrenia-relevant behavioral assay that measures our ability  
18 to ignore/suppress irrelevant stimuli during associative learning. Previously, the effect of the  
19 antipsychotic blonanserin was tested in rats where latent inhibition (induced using acoustic stimuli  
20 and mild foot shocks) was disrupted by methamphetamine [67]. Disruption of latent inhibition was  
21 significantly improved by blonanserin. Immunohistochemical examination showed that  
22 blonanserin also increased c-Fos expression in the CeA but not in the basolateral amygdala or the  
23 prefrontal cortex. Both PPI and latent inhibition are considered measures of information

1 gating/filtering and their underlying neural circuitry overlap [68]. However, whereas PPI assesses  
2 early attentional or “pre-attentive” gating mechanisms, latent inhibition assesses later stages of  
3 information gating [69]. Together, these results, along with our *in vivo* findings, suggest that a  
4 subset of CeA neurons (including glutamatergic cells) are specifically involved in  
5 filtering/inhibiting irrelevant sensory information processing.

6

### 7 **Electrophysiological studies**

8 Previous studies aiming to describe the electrophysiological effect of activating CeA  
9 glutamatergic neurons used electrical stimulating electrodes, making it impossible to distinguish  
10 whether fibers of passage or CeA cell bodies were activated. Moreover, pharmacological  
11 activation of CeA neurons did not allow to selectively activate excitatory neurons [32]. To  
12 reconcile the glutamatergic nature of the CeA neurons projecting to the PnC with their contribution  
13 to an inhibitory phenomenon, here, we performed *in vitro* patch clamp recordings in GlyT2-CRE  
14 mice (**Fig. 8**). We recorded EPSPs in GlyT2<sup>+</sup> PnC neurons labeled with tdTomato, in response to  
15 targeted activation of CeA glutamatergic inputs expressing ChR2. Altogether, our results  
16 demonstrate that: 1-CeA glutamatergic projections activate GlyT2<sup>+</sup> PnC neurons via AMPA and  
17 NMDA receptors, and 2-CeA-PnC glutamatergic synapses display short-term synaptic facilitation.

18 Previous rat pharmacological *in vivo* studies showed that blocking AMPA and NMDA receptors  
19 in the PnC inhibits acoustic startle responses [70-72]. Interestingly, our behavioral data suggest  
20 that blocking a glutamatergic connection between the CeA and the PnC reduces PPI. Our PPI *in*  
21 *in vivo* results do not conflict with these previous studies showing the important role of the glutamate  
22 neurotransmission within the PnC startle pathway. Our *in vivo* results clearly indicate that during  
23 PPI, inhibition of startle involves CeA glutamatergic cells directly projecting to the PnC and

1 activated by prepulses. In that context, acoustic prepulses activate glutamatergic receptors located  
2 on GlyT2<sup>+</sup> and likely also, PnC giant neurons. One hypothesis is that during PPI, CeA glutamate  
3 neurotransmission activates GlyT2<sup>+</sup> PnC neurons leading to a feedforward inhibition. This  
4 hypothesis is clearly supported by our *in vitro* electrophysiological recordings in PnC slices  
5 showing that AMPA/NMDA receptor blockers reduce the EPSPs in GlyT2<sup>+</sup> PnC neurons elicited  
6 by CeA glutamatergic fiber stimulation (**Fig. 8C**).

7 Paired photo-stimulation at CeA-PnC glutamatergic synapses elicited short-term synaptic  
8 facilitation of EPSPs at ISI of 50 and 100ms (**Fig. 8B**). Synaptic facilitation reflects presynaptic  
9 enhancement of neurotransmitter release, associated with residual calcium accumulation within  
10 presynaptic terminals following the first stimulation [73]. Interestingly, the synaptic facilitation  
11 we recorded at CeA-PnC glutamatergic synapses and the CeA-dependent PPI values we measured  
12 *in vivo* both occur within similar time scales.

13 Typically considered as a GABAergic (and non-cholinergic) nucleus, the CeA includes an  
14 ensemble of several other neurochemical and neuropeptide profiles, such as galanin, somatostatin,  
15 substance P, corticotropin-releasing factor [76-80]. In fact, the CeA sends GABAergic inputs to  
16 several brainstem regions adjacent to the PnC, such as the ventrolateral periaqueductal grey [81],  
17 locus coeruleus [82] and nucleus of the solitary tract [83]. Furthermore, altered GABAergic  
18 neurotransmission is seen in schizophrenia [84, 85] and is associated with abnormal acoustic startle  
19 reflex and PPI [86-90]. GABAergic neurotransmission was previously shown to modulate the  
20 startle pathway [91]. Although our data rule out the possibility that the CamKII $\alpha$ <sup>+</sup> CeA neurons  
21 we targeted are inhibitory (**Figs. 4 and 8**), future work should determine whether the CeA also  
22 contribute to PPI through GABAergic projections. Previous studies have highlighted the  
23 importance of pontine glutamatergic and GABAergic signaling during PPI. In addition, PPI is

1 sensitive to changes in glutamatergic and GABAergic transmission in several brain regions, such  
2 as the amygdala [26, 27, 86], hippocampus [87], superior colliculus [88], PPTg [20, 21, 89] and  
3 nucleus accumbens [90]. These brain regions also exhibit anatomical and functional abnormalities  
4 in neuropsychiatric disorders associated with sensorimotor gating deficits. Here, we provide  
5 evidence for a potential amygdala-dependent glutamatergic mechanism at the PnC level, that could  
6 be impaired in diseases associated with PPI deficits.

7

## 8 **Conclusions**

9 Overall, the results presented here along with the body of literature on the role of the  
10 amygdala on acoustic startle modulation, suggest that CeA excitatory neurons send inputs to the  
11 PnC, where they activate a subpopulation of GlyT2<sup>+</sup> neurons that contribute to PPI. We propose  
12 that the primary startle pathway (**Fig. 1**; red), is modulated by two parallel circuits: **1-** the well-  
13 established the CSPP network (**Fig. 1**; light blue and dark blue brain regions/pathways), and **2-** the  
14 CeA-PnC glutamatergic connection (**Fig. 1**; dark blue dotted connection delineated by the red  
15 dotted square). These two circuits ultimately converge at the level of the PnC. Our results are  
16 aligned with recent data obtained by other groups revisiting the theoretical constructs of PPI,  
17 describing glutamatergic, gabaergic and glycinergic underlying mechanisms. More importantly,  
18 our results shed light into the basic processes underlying sensory filtering, and our disease-relevant  
19 proposed circuit should expand insights derived from disease experimental systems.

20

21

22

23



## 1 **Materials and Methods**

### 2 **Mice**

3 Experiments were performed on C57BL/6 male mice (N=61; The Jackson Laboratory, Bar Harbor,  
4 ME), GlyT2-eGFP mice (N=6; graciously provided by Dr. Manuel Miranda-Arango, University  
5 of Texas at El Paso, El Paso, TX) and GlyT2-Cre<sup>+/-</sup> mice (N=10; graciously provided by Dr. Jack  
6 Feldman, University of California, Los Angeles). Litters were weaned at PND 21 and housed  
7 together until stereotaxic microinjections were performed at PND 70-84 (adult). Mice received  
8 food and water *ad libitum* in a 12hour light/dark cycle from 7:00 am to 7:00 pm. This age  
9 corresponds to the age of the animals used in the Paxinos and Franklin Mouse Brain Atlas, from  
10 which all the stereotaxic coordinates were derived, and cytoarchitectural boundaries delineated  
11 [42]. Following surgical procedures, mice were single-housed and monitored for the duration of  
12 the recovery period. Experiments were performed in accordance with and approved by the  
13 Institutional Animal Care and Use Committee of the University of Texas at El Paso (UTEP) and  
14 the University of Massachusetts Amherst (UMass).

15

### 16 **Stereotaxic microinjections**

17 Mice were sedated by inhaling 5% isoflurane vapors (Piramal Critical Care, Bethelhem, PA),  
18 then placed on a stereotaxic apparatus (model 900, David Kopf, Tujunga, CA) and immobilized  
19 using ear bars and a nose cone. Mice were maintained under 1.5%-2% isoflurane throughout the  
20 duration of the surgical procedure. With bregma as a reference, the head of the mice were leveled  
21 on all 3 axes. A craniotomy was performed directly dorsal to the injection site. Then, using a  
22 microinjector (Stoelting Co., Wood Lane, IL) with a 5 $\mu$ l Hamilton syringe (Hamilton Company  
23 Inc., Reno, NV) and a 32 gauge steel needle, unilateral injections of 50-80nl of the retrograde

1 neuronal tracer Fluoro-Gold (Molecular Probes, Eugene, OR, catalog# H22845, lot# 1611168)  
2 were infused into the PnC (coordinates from bregma: AP -5.35mm; ML +0.5mm, DV -5.6mm;  
3 N=4 mice). The CAG-FLEX-tdTomato or rAAVDJ/Ef1 $\alpha$ -DIO-eArch3.0-eYFP viral vectors were  
4 injected (200nl) in the PnC of mice expressing the CRE recombinase enzyme in GlyT2<sup>+</sup> neurons  
5 (GlyT2-Cre mice; N=10). In separate animal cohorts, 100-125nl of AAV particles were  
6 unilaterally injected in the CeA (AP -1.35mm, ML +2.66mm, DV -4.6mm). For these viral  
7 injections, pAAV DJ-CamKII $\alpha$ -eArch3.0-eYFP, pAAV DJ-CamKII $\alpha$ -NpHR3.0-eYFP, pAAV  
8 DJ-CamKII $\alpha$ -hChR2(H134R)-eYFP, pAAV DJ-CamKII $\alpha$ -eYFP or pAAV DJ-CamKII $\alpha$ -mCherry  
9 viral particles were used ( $4 \times 10^{12}$  particles/mL; all vectors were obtained from the Deisseroth  
10 Lab/Optogenetics Innovation Lab, Stanford University, Palo Alto, CA). Fluoro-Gold and viral  
11 particles were delivered at a rate of 50nL/min. The microinjection syringe was left in place for 10  
12 minutes after infusion to limit spillover during needle retraction. Mice injected with Fluoro-Gold  
13 recovered for 5-7 days, to allow optimal Fluoro-Gold retrograde transport to occur. AAV-injected  
14 mice recovered for 3-5 weeks to allow sufficient time for maximal viral transduction.

15

## 16 **Immunohistochemistry**

17 Mice were perfused transcardially with 0.9% saline solution for 10mins followed by 4%  
18 paraformaldehyde (PFA) in 0.1M phosphate buffer saline (PBS; pH 7.4) for 15 mins, brains were  
19 then extracted and post-fixed overnight in 12% sucrose in PFA solution. After three 0.1M PBS  
20 rinses (5 minutes each), brains were frozen in chilled hexanes for 1 minute and stored at -80°C.  
21 Using a microtome, four 1-in-5 series of 30 $\mu$ m coronal sections were cut, and stored in  
22 cryoprotectant (50% 0.05 M phosphate buffer, 30% ethylene glycol, 20% glycerol) at -20°C. One  
23 of the series was rinsed three times (5mins each) with 0.1M Tris-buffered saline (TBS; pH 7.4),

1 mounted and coverslipped to visualize injection and projection sites. An adjacent series of brain  
2 sections was Nissl-stained to determine plane of section, and delineate cytoarchitectural  
3 boundaries. The two remaining series were used for immunohistochemistry. For mice injected with  
4 Fluoro-Gold, coronal tissue sections at the level of the PnC, CeA and PPTg were washed with  
5 0.1M TBS (5 washes, 5 mins each), and incubated in blocking solution (2% normal donkey serum,  
6 0.1% Triton X-100; in 0.1M TBS) for 1-2 hours at room temperature. PPTg sections were  
7 incubated with a goat anti-ChAT primary antibody (1:100, Millipore, catalog# AB144P-200UL,  
8 lot# 2854034) for 60 hours at 4°C, washed with TBS, and then incubated in a Cy3-conjugated  
9 donkey anti-goat secondary antibody (1:500, Jackson ImmunoResearch Laboratories, catalog#  
10 705-165-147, lot# 115611) for 4-5 hours at room temperature. Tissue slices were then washed with  
11 TBS, mounted and coverslipped. Similarly, for mice injected with viral particles, tissue sections  
12 containing the PnC, CeA and the PPTg were incubated in a chicken anti-GFP primary antibody  
13 (1:1000, Abcam, catalog# ab13970, lot# GR236651-13), then incubated in an Alexa Fluor 488-  
14 conjugated donkey anti-chicken secondary antibody (1:500, Jackson ImmunoResearch  
15 Laboratories, catalog# 703-545-155, lot# 130357), followed by incubation in NeuroTrace™  
16 (640/660 deep red fluorescent nissl stain, 1:100 in TBS, ThermoFisher, catalog# N21483).  
17 NeuroTrace™ was alternatively used to determine plane of section and cytoarchitecture. Tissue  
18 sections at the level of the PnC of GlyT2-eGFP mice injected with pAAV DJ-CamKII $\alpha$ -mCherry  
19 in the CeA (N=6 mice) were incubated with a chicken anti-mCherry (1:1000, Abcam, catalog#  
20 ab205402, lot# GR225123-3) and a rabbit anti-PSD95 (1:500, Abcam, catalog# ab12093, lot#  
21 GR317630-1) primary antibodies. Then, sections were incubated with a Cy3-conjugated donkey  
22 anti-chicken (1:500, Jackson ImmunoResearch Laboratories, catalog# 703-165-155, lot# 130328)

1 and a Cy5-conjugated donkey anti-rabbit (1:500, Jackson-ImmunoResearch Laboratories, catalog#  
2 705-545-147, lot#125100) as described above.

3

#### 4 ***In situ* hybridization**

5 Mice injected with pAAVDJ-CamKII $\alpha$ -eYFP in the CeA (N=3 mice) were anesthetized with  
6 inhaled isoflurane and rapidly decapitated. Brains were harvested, frozen in chilled isopentane and  
7 stored at -80°C. Serial coronal sections (15 $\mu$ m) at the level of the CeA were cut in a cryostat,  
8 directly mounted onto glass slides, and stored at -80°C. Tissue sections on slides were submerged  
9 in freshly prepared cold 4% PFA for 15 mins, rinsed twice briefly with 0.1M Phosphate Buffer  
10 (PB) and dehydrated in increasing ethanol solutions (50%, 70%, 100%, 100%; 5 mins each at room  
11 temperature). Then, the RNAscope assay (Advanced Cell Diagnostics) started by incubating in  
12 hydrogen peroxide (H<sub>2</sub>O<sub>2</sub>) for 10 mins in a humidified box, followed by protease III incubation  
13 for 15 mins. RNA hybridization probes against genes encoding mouse VGLUT2 (319171-C1),  
14 and eYFP (312131-C2) were then incubated for 2hr at 40°C. Antisense probes were also included  
15 as controls in a separate glass slide. Probe signals were then developed separately with Opal Dyes  
16 (opal 690 1:1.5K, opal 520 1:750), and coverslipped with ProLong Gold<sup>TM</sup> with DAPI.

17

#### 18 **Morphological Reconstruction**

19 Z-stacks from tissue sections of GlyT2-eGFP and GlyT2-Cre mice were obtained on a Nikon A1  
20 Resonant Confocal microscope (Nikon Instruments Inc., Melville, NY) equipped with NIS-  
21 Elements High Content Analysis software (version 5.02, Nikon Instruments Inc., Melville, NY).  
22 Tissue sections containing labeled CeA and PnC neurons were first examined on a single Z-plane  
23 with the 10x objective to survey the tissue section. Using a 60x objective, an area (212.56 $\mu$ m width

1 x 212.56 $\mu$ m height) within CeA and PnC sections were then sequentially scanned by the 488, 561  
2 and 640nm laser lines in 0.1 $\mu$ m Z-steps throughout the 30 $\mu$ m tissue section. Z-stacks were  
3 analyzed with NIS-Elements 5.0 Advanced Research software (version 5.02, Nikon Instruments  
4 Inc., Melville, NY). To visualize close appositions of CeA axons (labeled with mCherry) with  
5 GlyT2<sup>+</sup> neurons (labeled with eGFP) in GlyT2-eGFP mice, a binary layer was configured to  
6 segregate putative synaptic contacts of >50nm in distance (due to technical limitations). These  
7 contacts were imaged in split-channels and orthogonal views. Then, z-stacks were reconstructed  
8 in three-dimension and volume was rendered.

9

#### 10 **Nissl stain**

11 Series of tissue slices were mounted on gelatin-coated slides and air-dried overnight. Slides were  
12 immersed in deionized water, followed by ascending concentrations of ethanol (3mins each: 50%,  
13 75%, 95% and 100%), and then in xylenes (30mins). Brains slices were rehydrated in descending  
14 concentrations of ethanol and DI water, dipped 12-20 times in a thionin acetate solution, and then  
15 washed in DI water. Brains slices were dehydrated, slides were then coverslipped with DPX, and  
16 air-dried overnight.

17

#### 18 **Microscopy analysis**

19 Tissue sections were analyzed with an Axio Observer.Z1 epifluorescence microscope (Carl Zeiss  
20 Inc., Thornwood, NY) equipped with Fluoro-Gold, GFP, Cy3 filters, 10x and 40x objectives, a  
21 motorized stage and Axiovision Rel. 4.8 software (Carl Zeiss Inc., Thornwood, NY). To create  
22 photomontages, single Z-plane images were obtained with the MosaiX module of the Axiovision  
23 Rel. 4.8 software at 10x for each fluorophore sequentially (1024  $\times$  1024 pixel resolution). Images

1 acquired for the intensity and quantification of eYFP fluorescence analysis were captured and  
2 processed using identical settings. A total of 836 images (fluorescence and bright-field) were  
3 analyzed for each brain region. Nissl stained slices were imaged using bright field microscopy,  
4 and boundaries were delineated using Adobe Illustrator (Adobe, San Jose, CA).

5

## 6 **Electrophysiological recordings**

7 Whole-cell recordings were performed using glass pipettes (3–5 M $\Omega$ ) filled with intracellular  
8 solution (in mM): KMeSO<sub>4</sub> (125), KCl (10), HEPES (10), NaCl (4), EGTA (0.1), MgATP (4),  
9 Na<sub>2</sub>GTP (0.3), Phosphocreatine (10), Biocytin (0.1%) (pH=7.3; osmolarity=285–300 mosm). The  
10 glass microelectrode was mounted on a patch clamp headstage (Molecular Devices LLC,  
11 Sunnyvale, CA; catalog# CV-7B), which was attached to a multi-micromanipulator (Sutter  
12 Instrument, Novato, CA; catalog# MPC-200). Data were acquired with pClamp10 software using  
13 a MultiClamp™ 700B amplifier (Molecular Devices LLC, Sunnyvale, CA) and a Digidata 1550B  
14 digitizer (Molecular Devices LLC, Sunnyvale, CA). EYFP-expressing CeA cells and tdTomato-  
15 expressing GlyT<sub>2</sub><sup>+</sup>PnC cells were imaged and targeted using NIS-Elements Basic Research  
16 software (version 5.11, Nikon Instruments Inc., Melville, NY). Only cells with an initial seal  
17 resistance greater than 1G $\Omega$ , a resting membrane potential between -60mV and -70mV, a holding  
18 current within -100pA to 100pA at resting membrane potential and overshooting action potentials  
19 were used.

20 In CeA slices, 15 pA depolarizing current steps were injected for 500 ms to induce action potentials  
21 in CeA neurons expressing CamKII $\alpha$ -Chr2-eYFP, in current clamp. Spontaneous EPSCs were  
22 recorded at a holding potential of -70 mV, in voltage clamp. Evoked EPSPs were also recorded in  
23 these CeA neurons held at -70mV, in response to a 1-ms blue light pulse. Blue light was delivered

1 every 30 secs using a 200 $\mu$ m optic fiber mounted on a micromanipulator connected to a blue LED  
2 (473nm; Plexon, Dallas, TX) and positioned in close proximity to the recorded neuron.

3 In PnC slices, electrical properties of the GlyT2<sup>+</sup> neurons were first recorded in voltage clamp.  
4 Spontaneous excitatory postsynaptic currents (sEPSC) were recorded for 5 mins at -70 mV, and  
5 inhibitory postsynaptic currents (IPSCs) were recorded for 5mins at 0mV. Then, in current clamp  
6 mode, 15 pA depolarizing current steps (from -150pA to 150pA) were injected for 500 ms to  
7 analyze the spiking properties of GlyT2<sup>+</sup> cells. Pulses of blue light (1 ms), applied every 30secs,  
8 were used to photo-stimulate CeA excitatory fibers in PnC slices. The photo-stimulation elicited  
9 EPSPs and EPSCs in GlyT2<sup>+</sup> neurons, held at -70mV. Paired light pulses with 50 and 100ms ISI  
10 were also delivered to characterize short-term plasticity. GlyT2<sup>+</sup> neurons were then held at 0mV,  
11 to record light-evoked inhibitory post-synaptic current (IPSCs) or potentials (IPSPs). The NMDA  
12 receptor antagonist AP5 (50  $\mu$ M) and the AMPA receptor antagonist DNQX (25  $\mu$ M), were freshly  
13 diluted prior to use. At synapses between CeA excitatory cells and GlyT2<sup>+</sup> neurons, synaptic events  
14 were recorded for 10 minutes in aCSF. Then, 20 mins after the bath application of glutamate  
15 receptors antagonists, synaptic events were recorded during 10-minutes in the presence of the  
16 antagonists. This was followed by a 20 minutes washout period, and synaptic events were recorded  
17 during the following 10 mins, in aCSF.

18 At the end of all whole cell recordings, the cell membrane was sealed by forming an outside-out  
19 patch. The glass microelectrode was slowly retracted, and as the series resistance increased, the  
20 membrane potential was clamped at -40mV. The 300 $\mu$ m-thick acute brain slices containing the  
21 recorded cells (CeA or PnC) were immersed in 4% PFA solution overnight. Following overnight  
22 PFA fixation, these brain slices were rinsed with PBS (3 times, 5mins each). Slices were then  
23 incubated in anti-RFP and/or anti-GFP antibodies and in complementary secondary antibodies to

1 enhance the fluorescence of the viral vectors used. Following PBS rinses, slices were incubated  
2 with Cy5-conjugated streptavidin (a biotin-binding protein) diluted in PBS (with 0.1% Triton X-  
3 100) at room temperature for 4-5 hours or overnight at 4°C. Slices were then rinsed with PBS,  
4 mounted on glass slides, coverslipped and sealed with ProLong™ Gold antifade reagent  
5 (Invitrogen by ThermoFisher Scientific, Waltham, MA, catalog# P36934, lot# 1943081), and air  
6 dried overnight in the dark.

## 7

### 8 **Behavioral testing**

9 Three to four weeks after the viral injection in the CeA, non-injected WT control mice and WT  
10 mice injected with a viral vector were sedated by inhaling 5% isoflurane vapors, placed in a  
11 stereotaxic apparatus, and immobilized using ear bars and a nose cone. Mice were maintained  
12 under anesthesia (1.5%-2% isoflurane), the head was leveled in all three axes. With bregma as a  
13 reference, a craniotomy was drilled directly dorsal to the implantation site, at the PnC level. A  
14 cannula guide with a 200µm core optical fiber (Thorlabs, Newton, NJ) was then implanted over  
15 the PnC (AP -5.35mm, ML +0.5mm, DV -5.3mm), and cemented to the skull with dental cement  
16 (Parkell, Edgewood, NY). Mice recovered for 7 days post-surgery before behavioral testing. Mice  
17 underwent the PPI task in a startle response system (PanLab System, Harvard Apparatus,  
18 Holliston, MA). Behavioral testing trials were designed, and data were recorded using PACKWIN  
19 V2.0 software (Harvard Apparatus, Holliston, MA). Sound pressure levels were calibrated using  
20 a standard SPL meter (model 407730, Extech, Nashua, NH). Mice were placed on a movement-  
21 sensitive platform. Vertical displacements of the platform induced by startle responses were  
22 converted into a voltage trace by a piezoelectric transducer located underneath the platform. Startle  
23 amplitude was measured as the peak to peak maximum startle magnitude of the signal measured  
24 during a 1s window following the presentation of the acoustic stimulation. Prior to any testing



1 session, animals were first handled and acclimatized to the testing chamber, where the mice were  
2 presented to a 65dB background noise, for 10 mins. This acclimatization period was used to reduce  
3 the occurrence of movement and artifacts throughout testing trials. Following the acclimatization  
4 period, an input/output (I/O) assay was performed to test startle reactivity. This I/O test began with  
5 the presentation of a 40-ms sound at different intensities (in dB: 70, 80, 90, 100, 110 and 120)  
6 every 15s, in a pseudorandomized order. Background noise (65dB) was presented during the 15s  
7 between sounds. A total of 35 trials (i.e. 7 sound intensities, each sound presented 5 times) were  
8 acquired and quantified. Startle reactivity, derived from this I/O assay, allowed the gain of the  
9 movement-sensitive platform to be set. This gain allowed the startle responses to be detected  
10 within a measurable range. Once determined, the gain for each experimental subject was kept  
11 constant throughout the remaining of the experiment. Following a one-hour resting period, mice  
12 were presented with seven startle-inducing 120 dB (40 ms) sounds called “Pulse-alone”  
13 stimulations. These 120 dB sounds were presented every 29 secs (interspersed with 65dB  
14 background noise), and were used to achieve a stable baseline startle response. The following PPI  
15 test consisted of two different conditions as follows: 1- startling pulse-alone stimulations (for  
16 baseline startle amplitude), and 2- combinations of a prepulse (75 dB noise; 20 ms) followed a 120  
17 dB startling pulse (40 ms) at 8 different interstimulus intervals (in ms): 10, 30, 50, 100, 200, 300,  
18 500, and 1000 (end of prepulse to onset of startle pulse). The inter-trial interval of these two  
19 conditions was 29 secs.

20 For combined optogenetic manipulations, animals injected with either control viral vectors or  
21 vectors containing Chr2 (N=8 mice), Arch3.0 (N=8 mice), NpHR3.0 (N=8 mice) or the control  
22 vector (pAAV DJ-CamKII $\alpha$ -eYFP; N=8) were tested in the startle chamber. These animals were  
23 closely monitored to ensure that they were comfortably tethered to an optic fiber, which exited

1 through a small opening from the roof of the startle chamber. The optic fiber (200  $\mu$ m diameter,  
2 Thorlabs, Newton, NJ) was connected to the animal's head via a cannula implanted on the head of  
3 the mouse with a zirconia sleeve (Thorlabs, Newton, NJ). Animals were tethered ~15 mins before  
4 testing and allowed to move freely, exploring their home cages before being transferred to the  
5 startle chamber. Optogenetic stimulation was triggered by a signal from the Packwin software  
6 (PanLab System; Harvard Apparatus, Holliston, MA), which was transformed into a TTL-pulse.  
7 This TTL-pulse triggered a waveform generator (DG1022, Rigol Technologies), which was used  
8 to modulate light stimulation. Photo-stimulation was delivered using a blue 473nm laser (Opto  
9 Engine LLC, Midvale, UT) for ChR2 activation. Photo-inhibition was delivered using a yellow  
10 593.5nm laser (Opto Engine LLC, Midvale, UT) for NpHR3.0 activation, or a green 532nm LED  
11 (Plexon, Dallas, TX) for Arch3.0 activation. During PPI trials paired with optogenetic  
12 manipulations, a train of light stimulation (1ms light ON, 200ms light OFF) was delivered at 5Hz  
13 and was either: 1- paired with the pulse-alone stimulation, or 2- delivered 1sec before the prepulse,  
14 lasting the entire ISI. During PPI trials with optical stimulation used as a prepulse, a 5Hz or 20Hz  
15 stimulation train (3 pulses of 15ms) was delivered at various ISI (10, 30, 50, 100, 200, 300, 500,  
16 and 1000 ms; end of prepulse to onset of startle pulse) prior to the startling pulse. At the end of  
17 each experiment, histological analyses were performed to confirm that: 1- the injected viral  
18 particles were confined to the CeA, and 2- the cannula guide placement was successfully aimed at  
19 the PnC. If these criteria were not met, the subject was excluded from the study.

20

## 21 **Statistical analysis**

22 Cell counting of eYFP-labeled or VGLUT2-expressing somata within the CeA was performed in  
23 a tissue slice series of 6 slices spanning levels 40 to 44 of the Paxinos and Franklin Mouse Brain

1 Atlas [42]. Imaging was performed as outlined in the Microscopy Analysis section. Percentages  
2 of labeled somata were calculated as eYFP+/Neurotrace-labeled cells (Fig 3) or VGLUT2+/eYFP+  
3 (Fig 4). Statistical analyses were performed using SigmaPlot (Systat Software, Inc., San Jose, CA).  
4 Normality and equal variance of the data were first tested, and data transformations were made  
5 before performing further statistical analyses. We determined the significance of the interaction  
6 between the factors assessed using ANOVA. For the results of whole-cell patch-clamp recordings  
7 with receptor antagonists, one-way repeated-measures (RM) ANOVA and Tukey post-hoc testing  
8 were used to assess the effect of the receptor antagonists on the light-evoked events. For PPI *in*  
9 *vitro* results, one-way ANOVAs and Tukey post-hoc testing were used to reveal if at any ISI the  
10 electrically-evoked fEPSPs were significantly attenuated by the optical stimulation of CeA-PnC  
11 excitatory synapses. PPI was defined and measured as  $[1 - (\text{startle amplitude during}$   
12  $\text{“Prepulse+Pulse” trials} / \text{startle amplitude during “Pulse” trials})] \times 100$ . Two-way RM ANOVA  
13 was used to assess the effect of the vector used, light, sound intensity/ISI and light interaction and  
14 the interaction among groups. Then Tukey testing was applied for post-hoc comparisons. For  
15 optical stimulation experiments where the photo-stimulation of CeA fibers was used as a prepulse  
16 *in vivo*, two-way RM ANOVA was used to assess the effect of the stimulation modality/frequency  
17 used, ISI, ISI and stimulation modality/frequency interaction and the interaction among groups.  
18 Then, Tukey testing was applied for post-hoc comparisons. A confidence level of  $p < 0.05$  was  
19 considered statistically significant. Sample sizes were chosen based on expected outcomes,  
20 variances and power analysis. Data are presented as means  $\pm$  SEM. N indicates total number of  
21 animals; n indicates total number of brain slices or testing trials. Adobe Illustrator was used to  
22 create figures.

23

## 1 **Declarations**

## 2 **Availability of data and materials**

3 The datasets used and/or analyzed during the current study are available from the corresponding  
4 author on reasonable request. All data generated or analyzed during this study are included in this  
5 published article and its supplementary information files. Details about the GlyT2-Cre mice can  
6 be found in Giber et al., 2015 [55]. Details about the GlyT2-eGFP mice can be found in Zeilhofer  
7 et al., 2005 [39].

## 9 **Competing interests**

10 The authors declare that they have no competing interests.

11

## 12 **Funding**

13 The UTEP startup funds, UMass startup funds and NIH-SC1 (SC1GM118242) grant (to K.F.), and  
14 the Drs. Ellzey Scholars Graduate Research Fellowship, the Dodson Grant and the NIH F99/K00  
15 (8K00MH125434-03) grants (to J.C.C.) supported this research.

16

## 17 **Authors' contributions**

18 J.C.C. and K.F. conceptualized the study; J.C.C. and W.H., performed the experiments, analyzed  
19 the data and perform the statistical analyses; J.C.C. and K.F. wrote the paper; J.C.C., W.H. and  
20 K.F. revised the final version of the paper. All authors read and approved the final manuscript.

## 21 **Acknowledgments**

22 We thank Ms. Carla D. Loyola (UTEP) for the technical support and for the animal care; Dr.  
23 Stephanie Padilla (UMass), Dr. Jack Feldman (UCLA), Dr. Manuel Miranda-Arango, Dr. Ellen

1 M. Walker and Ken Negishi (UTEP) for the technical assistance; Dr. Joseph A. Gogos (Columbia  
2 University), Dr. Amy B. MacDermott (Columbia University), Dr. Arshad M. Khan (UTEP) and  
3 Dr. Paul S. Katz (UMass) for the insightful discussions; and Dr. James Chambers for the assistance  
4 with the three dimensional reconstructions performed at the Light Microscopy Facility at UMass  
5 Amherst.

6

7 **Ethics approval and consent to participate**

8 Not applicable.

9

10 **Consent for publication**

11 Not applicable.

12

13 **Author details**

14 <sup>1</sup>Department of Biological Sciences, University of Texas at El Paso, 500 West University  
15 Avenue, El Paso, TX, 79912, U.S.A. <sup>2</sup>Biology Department, University of Massachusetts  
16 Amherst, Life Science Laboratories, 240 Thatcher Road, Amherst, MA, 01002, U.S.A.

17

18

19

20

21

## 1 **References**

- 2 1. Braff DL, Stone C, Callaway E, Geyer M, Glick I, Bali L. Prestimulus effects on human startle  
3 reflex in normals and schizophrenics. *Psychophysiology*. 1978;15: 339-343.
- 4 2. Swerdlow NR, Braff DL, Geyer, MA. Cross-species studies of sensorimotor gating of the  
5 startle reflex. *Ann N Y Acad Sci*. 1999;29: 202-216.
- 6 3. Perry W, Braff DL. Information-processing deficits and thought disorder in schizophrenia.  
7 *Am J Psychiatry*. 1994;151: 363-367.
- 8 4. Li L, Du Y, Li N, Wu X, Wu Y. Top-down modulation of prepulse inhibition of the startle  
9 reflex in humans and rats. *Neurosci Biobehav Rev*. 2009;33: 1157-1167.
- 10 5. Swerdlow NR, Benbow CH, Zisook S, Geyer MA, Braff DL. A preliminary assessment of  
11 sensorimotor gating in patients with obsessive compulsive disorder. *Biol Psychiatry*. 1993;33:  
12 298-301.
- 13 6. Hoenig K, Hochrein A, Quednow BB, Maier W, Wagner M. Impaired prepulse inhibition of  
14 acoustic startle in obsessive-compulsive disorder. *Biol Psychiatry*. 2005;57: 1153-1158.
- 15 7. Castellanos FX, Fine EJ, Kaysen D, Marsh WL, Rapoport JL, Hallett M. Sensorimotor gating  
16 in boys with Tourette's syndrome and ADHD: preliminary results. *Biol Psychiatry*. 1996;39:  
17 33-41.
- 18 8. Grillon C, Morgan CA, Southwick SM, Davis M, Charney DS. Baseline startle amplitude and  
19 prepulse inhibition in Vietnam veterans with posttraumatic stress disorder. *Psychiatry Res*.  
20 1996;64: 169-178.
- 21 9. Graham FK. The more or less startling effects of weak prestimulation. *Psychophysiology*.  
22 1975;12: 238-248.

- 1 10. Davis M, Gendelman DS, Tischler MD, Gendelman PM. A primary acoustic startle circuit:  
2 lesion and stimulation studies. *J Neurosci*. 1982;2: 791-805.
- 3 11. Lee Y, López DE, Meloni EG, Davis M. A primary acoustic startle pathway: obligatory role  
4 of cochlear root neurons and the nucleus reticularis pontis caudalis. *J Neurosci*. 1996;16:  
5 3775-3789.
- 6 12. Swerdlow NR, Geyer MA, Braff DL. Neural circuit regulation of prepulse inhibition of startle  
7 in the rat: current knowledge and future challenges. *Psychopharmacology (Berl)*. 2001;156:  
8 194-215.
- 9 13. Koch M, Kungel M, Herbert H. Cholinergic neurons in the pedunculopontine tegmental  
10 nucleus are involved in the mediation of prepulse inhibition of the acoustic startle response in  
11 the rat. *Exp Brain Res*. 1993;97: 71-82.
- 12 14. Swerdlow NR, Geyer MA. Prepulse inhibition of acoustic startle in rats after lesions of the  
13 pedunculopontine tegmental nucleus. *Behav Neurosci*. 1993;107(1): 104-117.  
14 doi:10.1037//0735-7044.107.1.104
- 15 15. MacLaren DA, Markovic T, Clark, SD. Assessment of sensorimotor gating following  
16 selective lesions of cholinergic pedunculopontine neurons. *Eur J Neurosci*. 2014;40: 3526-  
17 3537.
- 18 16. Azzopardi E, Louttit AG, DeOliveira C, Laviolette SR, Schmid S. The role of cholinergic  
19 midbrain neurons in startle and prepulse inhibition. *J Neurosci*. 2018;38: 8798-8808.
- 20 17. Fulcher N, Azzopardi E, De Oliveira C, Hudson R, Schormans AL, Zaman T, et al.  
21 Deciphering midbrain mechanisms underlying prepulse inhibition of startle. *Prog Neurobiol*.  
22 2020;185: 101734. doi:10.1016/j.pneurobio.2019.101734

- 1 18. Wang HL, Morales M. Pedunculopontine and laterodorsal tegmental nuclei contain distinct  
2 populations of cholinergic, glutamatergic and GABAergic neurons in the rat. *Eur J Neurosci.*  
3 2009;29(2): 340-358. doi:10.1111/j.1460-9568.2008.06576.x
- 4 19. Curtin PC, Preuss T. Glycine and GABAA receptors mediate tonic and phasic inhibitory  
5 processes that contribute to prepulse inhibition in the goldfish startle network. *Front Neural*  
6 *Circuits.* 2015;9: 12. doi:10.3389/fncir.2015.00012
- 7 20. Bergeron SA, Carrier N, Li GH, Ahn S, Burgess HA. Gsx1 expression defines neurons  
8 required for prepulse inhibition. *Mol Psychiatry.* 2015;20: 974-985.
- 9 21. Tabor KM, Smith TS, Brown M, Bergeron SA, Briggman KL, Burgess HA. Presynaptic  
10 inhibition selectively gates auditory transmission to the brainstem startle circuit. *Curr Biol.*  
11 2018;28: 2527-2535.
- 12 22. Ho NF, Li Hui Chong P, Lee DR, Chew QH, Chen G, Sim K. The Amygdala in Schizophrenia  
13 and Bipolar Disorder: A Synthesis of Structural MRI, Diffusion Tensor Imaging, and Resting-  
14 State Functional Connectivity Findings. *Harv Rev Psychiatry.* 2019;27(3):150-164.  
15 doi:10.1097/HRP.0000000000000207
- 16 23. Decker MW, Curzon P, Brioni JD. Influence of separate and combined septal and amygdala  
17 lesions on memory, acoustic startle, anxiety, and locomotor activity in rats. *Neurobiol. Learn*  
18 *Mem.* 1995;64: 156-168.
- 19 24. Fendt M, Schwienbacher I, Koch M. Amygdaloid N-methyl-D-aspartate and gamma-  
20 aminobutyric acid(A) receptors regulate sensorimotor gating in a dopamine-dependent way in  
21 rats. *Neuroscience.* 2000;98(1):55-60. doi:10.1016/s0306-4522(00)00086-5
- 22 25. Koch M, Ebert U. Deficient sensorimotor gating following seizures in amygdala-kindled rats.  
23 *Biol Psychiatry.* 1998;44(4):290-297. doi:10.1016/s0006-3223(97)00397-1



- 1 26. Wan FJ, Swerdlow NR. The basolateral amygdala regulates sensorimotor gating of acoustic  
2 startle in the rat. *Neurosci.* 1997;76: 715-724.
- 3 27. Howland JG, Hannesson DK, Barnes SJ, Phillips AG. Kindling of basolateral amygdala but  
4 not ventral hippocampus or perirhinal cortex disrupts sensorimotor gating in rats. *Behav Brain*  
5 *Res.* 2007;177: 30-36.
- 6 28. Kim J, Zhang X, Muralidhar S, LeBlanc SA, Tonegawa S. Basolateral to Central Amygdala  
7 Neural Circuits for Appetitive Behaviors. *Neuron.* 2017;93: 1464-1479.
- 8 29. McDonald AJ. Cortical pathways to the mammalian amygdala. *Prog Neurobiol.* 1998;55: 257-  
9 332.
- 10 30. LeDoux JE, Iwata J, Cicchetti P, Reis DJ. Different projections of the central amygdaloid  
11 nucleus mediate autonomic and behavioral correlates of conditioned fear. *J Neurosci.* 1988;8:  
12 2517–2529.
- 13 31. Rosen JB, Hitchcock JM, Sananes CB, Miserendino MJ, Davis M. A direct projection from  
14 the central nucleus of the amygdala to the acoustic startle pathway: anterograde and retrograde  
15 tracing studies. *Behav Neurosci.* 1991;105: 817-825.
- 16 32. Koch M, Ebert U. Enhancement of the acoustic startle response by stimulation of an excitatory  
17 pathway from the central amygdala/basal nucleus of Meynert to the pontine reticular  
18 formation. *Exp Brain Res.* 1993;93: 231-241.
- 19 33. Rosen JB, Davis M. Enhancement of acoustic startle by electrical stimulation of the amygdala.  
20 *Behav Neurosci.* 1988;102: 195-202.
- 21 34. Hitchcock JM, Davis M. Efferent pathway of the amygdala involved in conditioned fear as  
22 measured with the fear-potentiated startle paradigm. *Behav Neurosci.* 1991;105: 826-842.

- 1 35. Grillon C, Ameli R, Woods SW, Merikangas K, Davis M. Fear-potentiated startle in humans:  
2 effects of anticipatory anxiety on the acoustic blink reflex. *Psychophysiology*.  
3 1991;28(5):588-595. doi:10.1111/j.1469-8986.1991.tb01999.x
- 4 36. Lingenhöhl K, Friauf E. Giant neurons in the rat reticular formation: a sensorimotor interface  
5 in the elementary acoustic startle circuit? *J Neurosci*. 1994; 14(3): 1176-1194.
- 6 37. Tapias-Espinosa C, Río-Álamos C, Sánchez-González A, Oliveras I, Sampedro-Viana D,  
7 Castillo-Ruiz MDM, et al. Schizophrenia-like reduced sensorimotor gating in intact inbred  
8 and outbred rats is associated with decreased medial prefrontal cortex activity and volume.  
9 *Neuropsychopharmacology*. 2019;44(11): 1975-1984. doi:10.1038/s41386-019-0392-x
- 10 38. Rampon C, Luppi PH, Fort P, Peyron C, Jouvet M. Distribution of glycine-immunoreactive  
11 cell bodies and fibers in the rat brain. *Neuroscience*. 1996;75(3): 737-755. doi:10.1016/0306-  
12 4522(96)00278-3
- 13 39. Zeilhofer HU, Studler B, Arabadzisz D, Schweizer C, Ahmadi S, Layh B, *et al.* Glycinergic  
14 neurons expressing enhanced green fluorescent protein in bacterial artificial chromosome  
15 transgenic mice. *J Comp Neurol*. 2005; 482: 123-141.
- 16 40. Geis HR, Schmid S. Glycine inhibits startle-mediating neurons in the caudal pontine reticular  
17 formation but is not involved in synaptic depression underlying short-term habituation of  
18 startle. *Neurosci Res*. 2011;71(2): 114-123. doi:10.1016/j.neures.2011.06.007
- 19 41. Rangarajan JR, Vande Velde G, van Gent F, De Vloo P, Dresselaers T, Depypere M, *et al.*  
20 Image-based in vivo assessment of targeting accuracy of stereotactic brain surgery in  
21 experimental rodent models. *Sci Rep*. 2016;6: 38058.
- 22 42. Paxinos G, Franklin KBJ. *The mouse brain in stereotaxic coordinates*, 2<sup>nd</sup> ed. San Diego:  
23 Academic Press; 2001.

- 1 43. McCullough KM, Morrison FG, Hartmann J, Carlezon WA Jr, Ressler KJ. Quantified  
2 Coexpression Analysis of Central Amygdala Subpopulations. *eNeuro*. 2018;5(1):  
3 ENEURO.0010-18.2018. doi:10.1523/ENEURO.0010-18.2018
- 4 44. Fung SJ, Xi M, Zhang J, Torterolo P, Sampogna S, Morales FR, et al. Projection neurons from  
5 the central nucleus of the amygdala to the nucleus pontis oralis. *J Neurosci Res*. 2011;89(3):  
6 429-436. doi:10.1002/jnr.22554
- 7 45. Nathanson JL, Yanagawa Y, Obata K, Callaway EM. Preferential labeling of inhibitory and  
8 excitatory cortical neurons by endogenous tropism of adeno-associated virus and lentivirus  
9 vectors. *Neuroscience*. 2009;161: 441-450.
- 10 46. Hitchcock J, Davis M. Lesions of the amygdala, but not of the cerebellum or red nucleus,  
11 block conditioned fear as measured with the potentiated startle paradigm. *Behav Neurosci*.  
12 1986;100(1): 11-22. doi:10.1037//0735-7044.100.1.11
- 13 47. Hopkins DA, Holstege G. Amygdaloid projections to the mesencephalon, pons and medulla  
14 oblongata in the cat. *Exp Brain Res*. 1978;32(4): 529-547. doi:10.1007/BF00239551
- 15 48. Krettek JE, Price JL. Amygdaloid projections to subcortical structures within the basal  
16 forebrain and brainstem in the rat and cat. *J Comp Neurol*. 1978;178(2): 225-254.  
17 doi:10.1002/cne.901780204
- 18 49. Price JL, Amaral DG. An autoradiographic study of the projections of the central nucleus of  
19 the monkey amygdala. *J Neurosci*. 1981;1(11): 1242-1259. doi:10.1523/JNEUROSCI.01-11-  
20 01242.1981
- 21 50. Takeuchi Y, Satoda T, Tashiro T, Matsushima R, Uemura-Sumi M. Amygdaloid pathway to  
22 the trigeminal motor nucleus via the pontine reticular formation in the rat. *Brain Res Bull*.  
23 1988;21(5): 829-833. doi:10.1016/0361-9230(88)90052-4

- 1 51. Yasui Y, Tsumori T, Oka T, Yokota S. Amygdaloid axon terminals are in contact with  
2 trigeminal premotor neurons in the parvicellular reticular formation of the rat medulla  
3 oblongata. *Brain Res.* 2004;1016(1): 129-134. doi:10.1016/j.brainres.2004.04.080
- 4 52. Boissard R, Fort P, Gervasoni D, Barbagli B, Luppi PH. Localization of the GABAergic and  
5 non-GABAergic neurons projecting to the sublaterodorsal nucleus and potentially gating  
6 paradoxical sleep onset. *Eur J Neurosci.* 2003;18(6): 1627-1639. doi:10.1046/j.1460-  
7 9568.2003.02861.x
- 8 53. Bosch D, Schmid S. Cholinergic mechanism underlying prepulse inhibition of the startle  
9 response in rats. *Neurosci.* 2008;155: 326-335.
- 10 54. Kandler K, Herbert H. Auditory projections from the cochlear nucleus to pontine and  
11 mesencephalic reticular nuclei in the rat. *Brain Res.* 1991;562(2): 230-242. doi:10.1016/0006-  
12 8993(91)90626-7
- 13 55. Giber K, Diana MA, Plattner V, Dugue GP, Bokor H, Rousseau CV, et al. A subcortical  
14 inhibitory signal for behavioral arrest in the thalamus. *Nat Neurosci.* 2015;18(4): 562-568.  
15 doi:10.1038/nn.3951
- 16 56. Koch M, Friauf E. Glycine receptors in the caudal pontine reticular formation: are they  
17 important for the inhibition of the acoustic startle response? *Brain Res.* 1995;671: 63-72.
- 18 57. Waldvogel HJ, Baer K, Eady E, Allen KL, Gilbert RT, Mohler H, et al. Differential  
19 localization of gamma-aminobutyric acid type A and glycine receptor subunits and gephyrin  
20 in the human pons, medulla oblongata and uppermost cervical segment of the spinal cord: an  
21 immunohistochemical study. *J Comp Neurol.* 2010;518(3): 305-328. doi:10.1002/cne.22212
- 22 58. Marsh RR, Hoffman HS, Stitt CL. Eyeblink inhibition by monaural and binaural stimulation:  
23 one ear is better than two. *Science.* 1976;192: 390-391.

- 1 59. Kumari V, Fannon D, Sumich AL, Sharma T. Startle gating in antipsychotic-naïve first episode  
2 schizophrenia patients: one ear is better than two. *Psychiatry Res.* 2007;151: 21-28.
- 3 60. Pellet J. Neural organization in the brainstem circuit mediating the primary acoustic head  
4 startle: an electrophysiological study in the rat. *Physiol Behav.* 1990;48: 727-739.
- 5 61. Frankland PW, Scott BW, Yeomans JS. Axons and synapses mediating electrically evoked  
6 startle: collision tests and latency analysis. *Brain Res.* 1995;670: 97-111.
- 7 62. Mahn M, Prigge M, Ron S, Levy R, Yizhar O. Biophysical constraints of optogenetic  
8 inhibition at presynaptic terminals. *Nat Neurosci.* 2016;19(4): 554-556. doi:10.1038/nn.4266
- 9 63. Xi M, Fung SJ, Sampogna S, Chase MH. Excitatory projections from the amygdala to neurons  
10 in the nucleus pontis oralis in the rat: an intracellular study. *Neuroscience.* 2011;197: 181-  
11 190. doi:10.1016/j.neuroscience.2011.09.029
- 12 64. Drew LJ, Crabtree GW, Markx S, Stark KL, Chaverneff F, Xu B, et al. The 22q11.2  
13 microdeletion: fifteen years of insights into the genetic and neural complexity of psychiatric  
14 disorders. *Int J Dev Neurosci.* 2011;29: 259-281.
- 15 65. Ellegood J, Markx S, Lerch JP, Steadman PE, Genç C, Provenzano F, *et al.* Neuroanatomical  
16 phenotypes in a mouse model of the 22q11.2 microdeletion. *Mol Psychiatry.* 2014;19: 99-107.
- 17 66. Stark KL, Xu B, Bagchi A, Lai WS, Liu H, Hsu R, *et al.* Altered brain microRNA biogenesis  
18 contributes to phenotypic deficits in a 22q11-deletion mouse model. *Nat Genet.* 2008;40: 751-  
19 760.
- 20 67. Kuramashi A, Abe H, Koganemaru G, Matsuo H, Ikeda T, Ebihara K, *et al.* Effect of  
21 blonanserin on methamphetamine-induced disruption of latent inhibition and c-Fos expression  
22 in rats. *Neurosci Lett.* 2013;549: 97-102.

- 1 68. Bakshi VP, Geyer MA, Taaid N, Swerdlow NR. A comparison of the effects of amphetamine,  
2 strychnine and caffeine on prepulse inhibition and latent inhibition. *Behav Pharmacol.*  
3 1995;6(8): 801-809.
- 4 69. Leumann L, Feldon J, Vollenweider FX, Ludewig K. Effects of typical and atypical  
5 antipsychotics on prepulse inhibition and latent inhibition in chronic schizophrenia. *Biol*  
6 *Psychiatry.* 2002;52(7): 729-739. doi:10.1016/s0006-3223(02)01344-6
- 7 70. Krase W, Koch M, Schnitzler HU. Glutamate antagonists in the reticular formation reduce the  
8 acoustic startle response. *Neuroreport.* 1993;4: 13-16.
- 9 71. Miserendino MJ, Davis M. NMDA and non-NMDA antagonists infused into the nucleus  
10 reticularis pontis caudalis depress the acoustic startle reflex. *Brain Res.* 1993;623: 215-222.
- 11 72. Steidl S, Faerman P, Li L, Yeomans JS. Kynurenate in the pontine reticular formation inhibits  
12 acoustic and trigeminal nucleus-evoked startle, but not vestibular nucleus-evoked startle.  
13 *Neuroscience.* 2004;126: 127-136.
- 14 73. Zucker RS, Regehr WG. Short-term synaptic plasticity. *Annu Rev Physiol.* 2002;64: 355-405.
- 15 74. Blundell J, Kaeser PS, Südhof TC, Powell CM. RIM1alpha and interacting proteins involved  
16 in presynaptic plasticity mediate prepulse inhibition and additional behaviors linked to  
17 schizophrenia. *J Neurosci.* 2010;30: 5326-5333.
- 18 75. Etherton MR, Blaiss CA, Powell CM, Südhof TC. Mouse neurexin-1alpha deletion causes  
19 correlated electrophysiological and behavioral changes consistent with cognitive  
20 impairments. *Proc Natl Acad Sci USA.* 2009;106: 17998–18003.
- 21 76. Cassell MD, Gray TS, Kiss JZ. Neuronal architecture in the rat central nucleus of the  
22 amygdala: a cytological, hodological, and immunocytochemical study. *J Comp Neurol.*  
23 1986;246: 478-499.

- 1 77. Gray TS, Magnuson DJ. Neuropeptide neuronal efferents from the bed nucleus of the stria  
2 terminalis and central amygdaloid nucleus to the dorsal vagal complex in the rat. *J Comp*  
3 *Neurol.* 1987;262: 365-374.
- 4 78. Hur EE, Zaborszky L. Vglut2 afferents to the medial prefrontal and primary somatosensory  
5 cortices: a combined retrograde tracing in situ hybridization study [corrected]. *J Comp Neurol.*  
6 2005;483: 351-373.
- 7 79. Poulin JF, Castonguay-Lebel Z, Laforest S, Drolet G. Enkephalin co-expression with classic  
8 neurotransmitters in the amygdaloid complex of the rat. *J Comp Neurol.* 2008;506: 943-959.
- 9 80. Ichikawa T, Ajiki K, Matsuura J, Misawa H. Localization of two cholinergic markers, choline  
10 acetyltransferase and vesicular acetylcholine transporter in the central nervous system of the  
11 rat: in situ hybridization histochemistry and immunohistochemistry. *J Chem Neuroanat.*  
12 1997;13: 23-39.
- 13 81. Swanson LW, Petrovich GD. What is the amygdala? *Trends Neurosci.* 1998;21: 323-331.
- 14 82. Jüngling K, Lange MD, Szkudlarek HJ, Lesting J, Erdmann FS, Doengi M, et al. Increased  
15 GABAergic efficacy of central amygdala projections to neuropeptide S neurons in the  
16 brainstem during fear memory retrieval. *Neuropsychopharmacology.* 2015;40: 2753-2763.
- 17 83. Saha S, Batten TF, Henderson Z. A GABAergic projection from the central nucleus of the  
18 amygdala to the nucleus of the solitary tract: a combined anterograde tracing and electron  
19 microscopic immunohistochemical study. *Neuroscience.* 2000;99: 613-626.
- 20 84. Benes FM, Berretta S. GABAergic interneurons: implications for understanding  
21 schizophrenia and bipolar disorder. *Neuropsychopharmacology.* 2001;25: 1-27.

- 1 85. Lewis DA, Volk DW, Hashimoto T. Selective alterations in prefrontal cortical GABA  
2 neurotransmission in schizophrenia: a novel target for the treatment of working memory  
3 dysfunction. *Psychopharmacology*. 2004;174: 143-150.
- 4 86. Forcelli PA, West EA, Murnen AT, Malkova L. Ventral pallidum mediates amygdala-evoked  
5 deficits in prepulse inhibition. *Behav Neurosci*. 2012;126: 290-300.
- 6 87. Ma J, Leung LS. GABA(B) receptor blockade in the hippocampus affects sensory and  
7 sensorimotor gating in Long-Evans rats. *Psychopharmacology (Berl)*. 2011;217: 167-176.
- 8 88. Fendt M. Enhancement of prepulse inhibition after blockade of GABA activity within the  
9 superior colliculus. *Brain Res*. 1999;833: 81-85.
- 10 89. Diederich K, Koch M. Role of the pedunclopontine tegmental nucleus in sensorimotor gating  
11 and reward-related behavior in rats. *Psychopharmacology (Berl)*. 2005;179: 402-408.
- 12 90. Swerdlow NR, Braff DL, Geyer MA. GABAergic projection from nucleus accumbens to  
13 ventral pallidum mediates dopamine-induced sensorimotor gating deficits of acoustic startle  
14 in rats. *Brain Res*. 1990;532: 146-150.
- 15 91. Yeomans JS, Bosch D, Alves N, Daros A, Ure RJ, Schmid S. GABA receptors and prepulse  
16 inhibition of acoustic startle in mice and rats. *Eur J Neurosci*. 2010;31: 2053-2061.

17  
18  
19  
20  
21  
22  
23



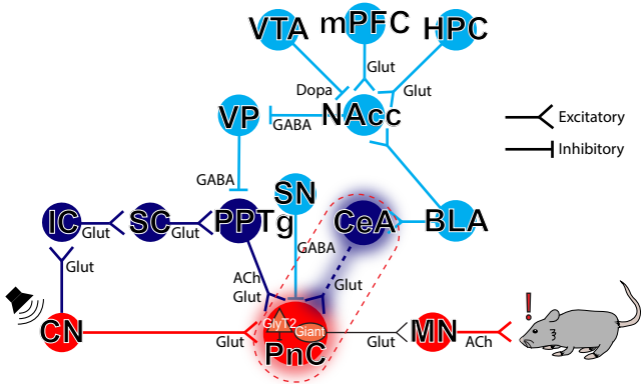

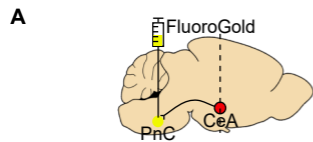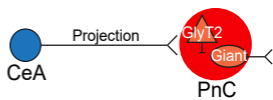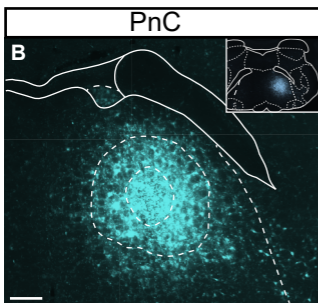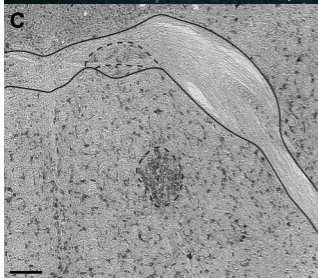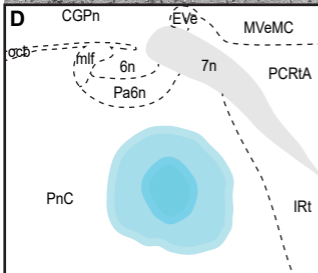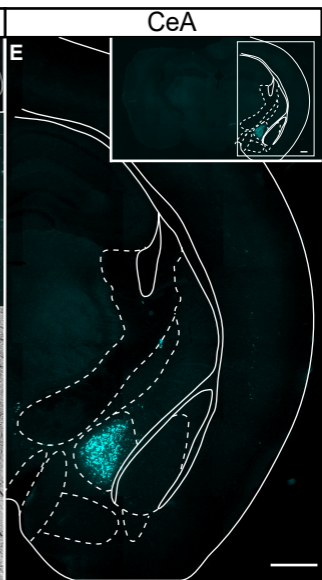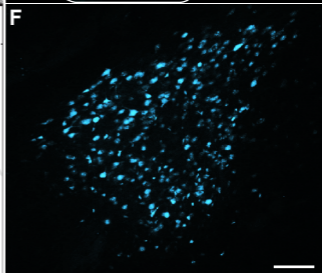

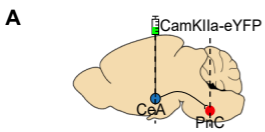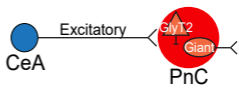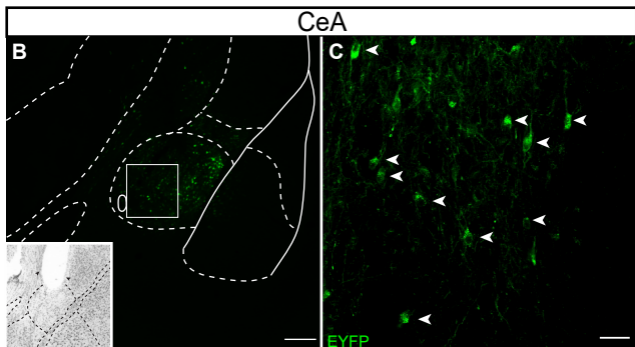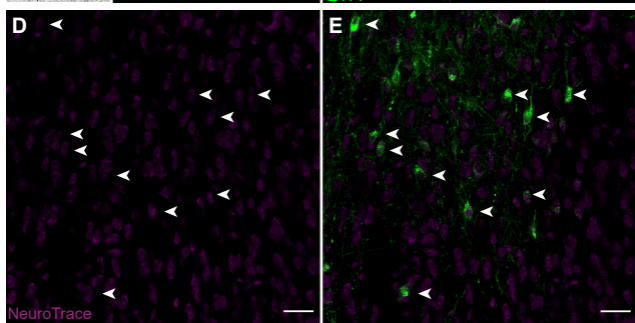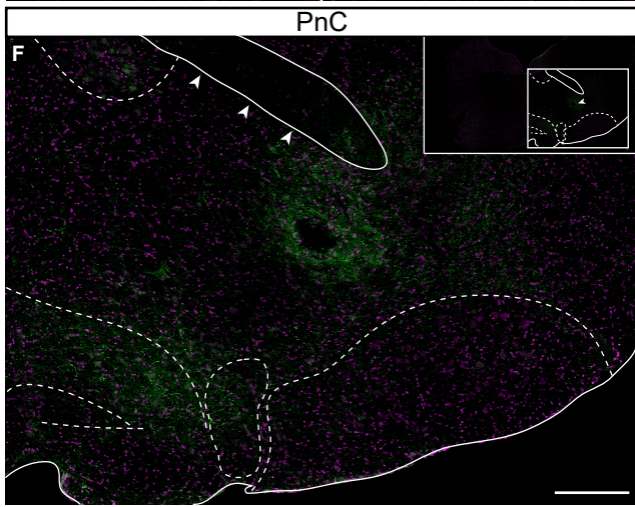

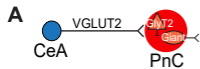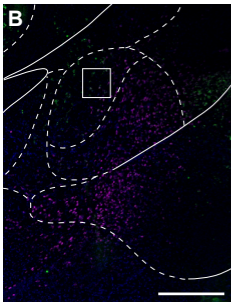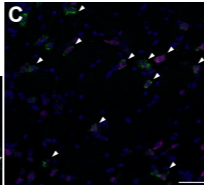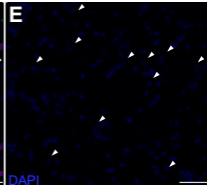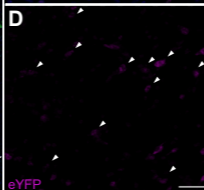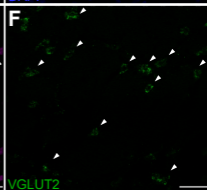

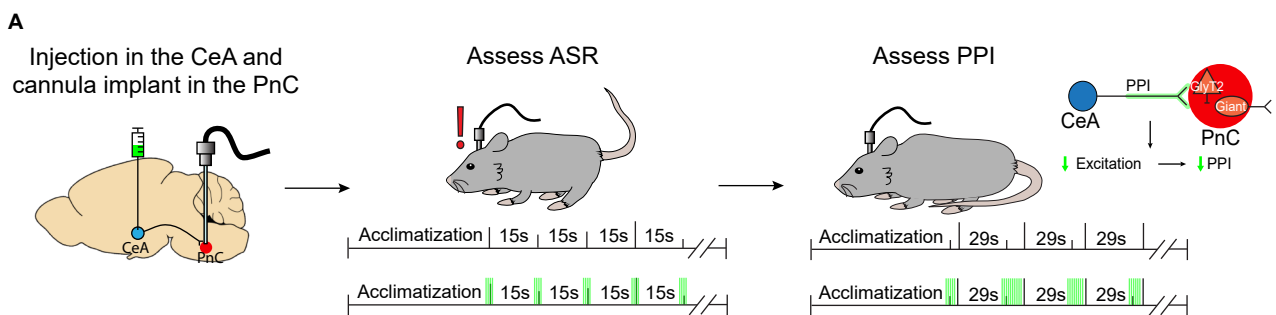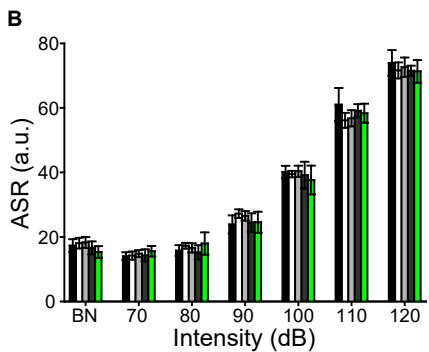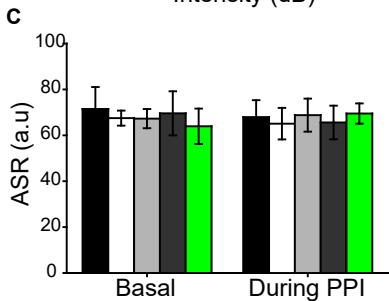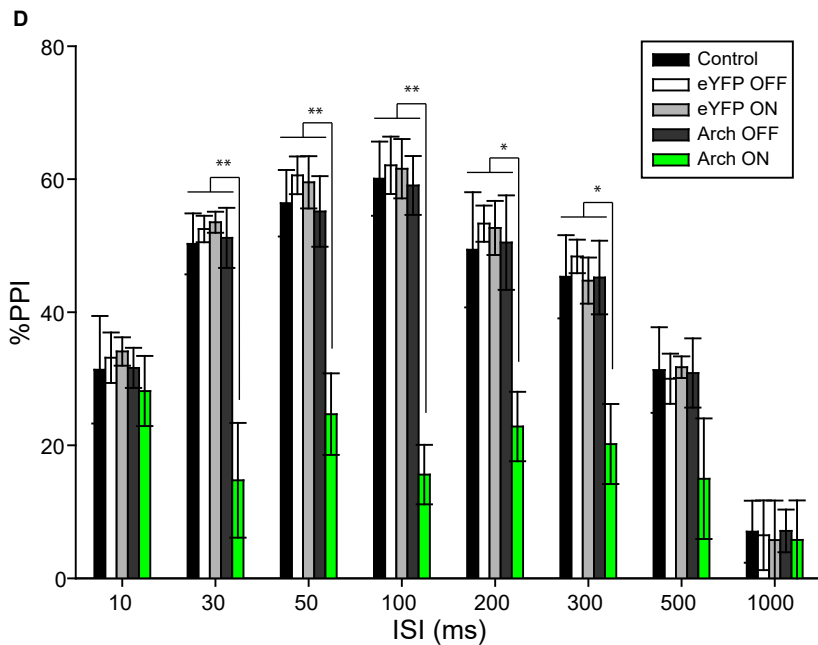

**A**

Acoustic prepulse

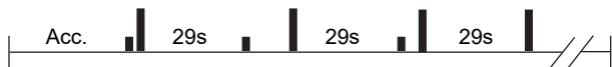

Light prepulse

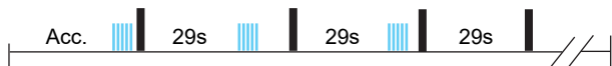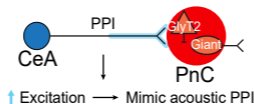**B**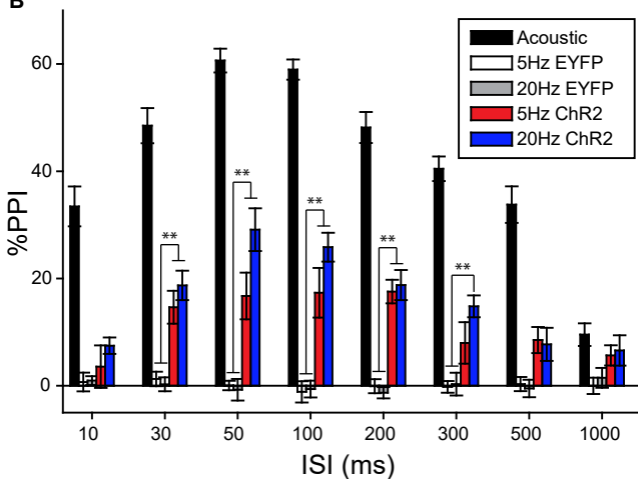

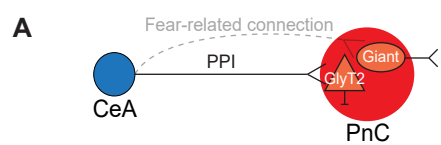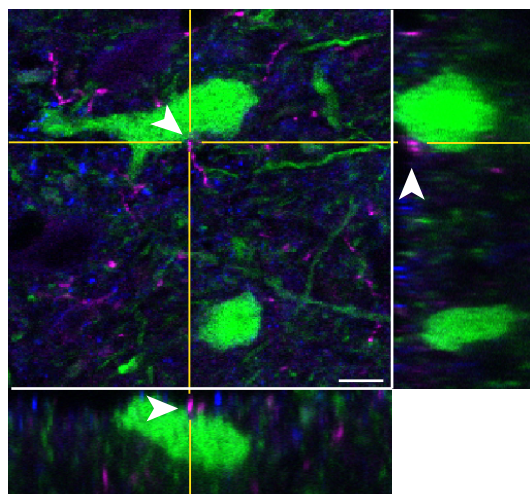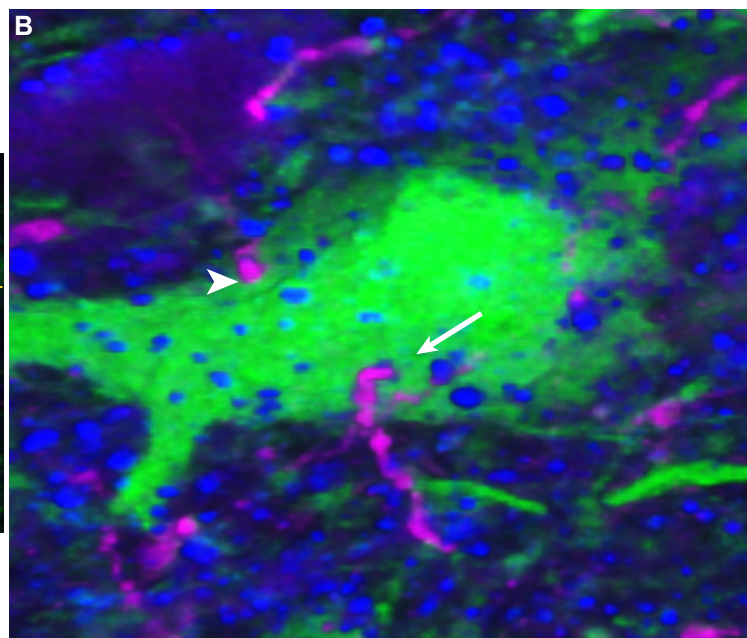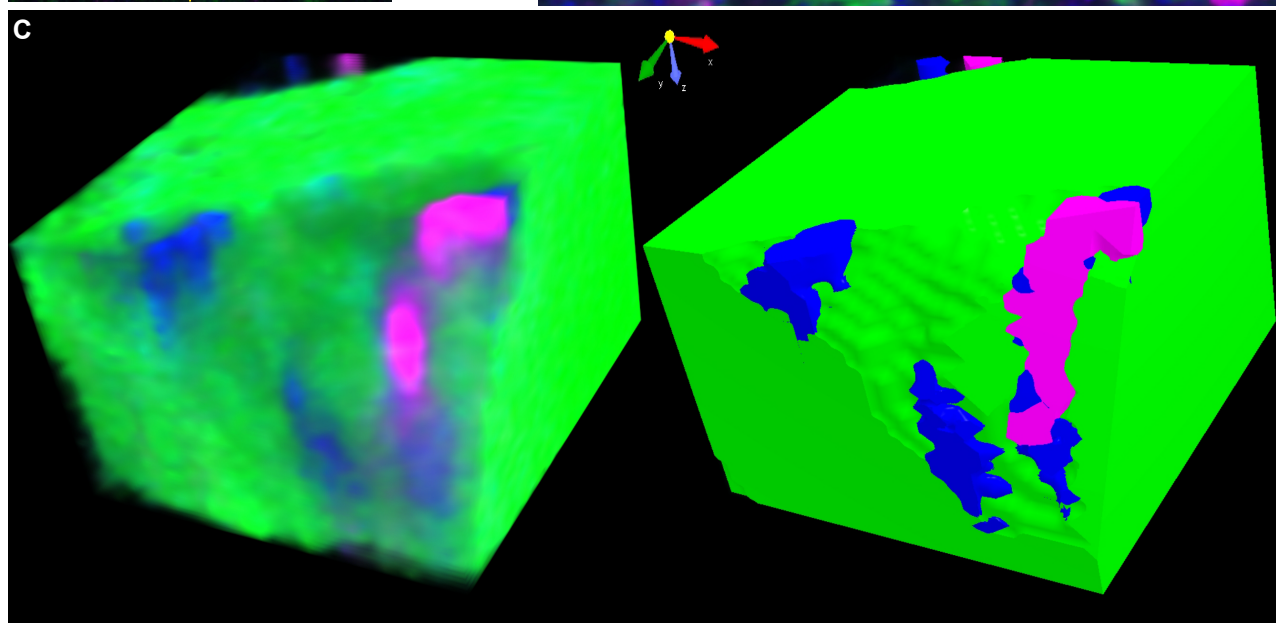

**A**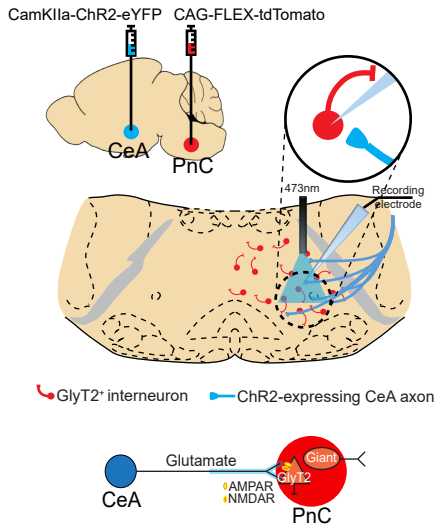**B**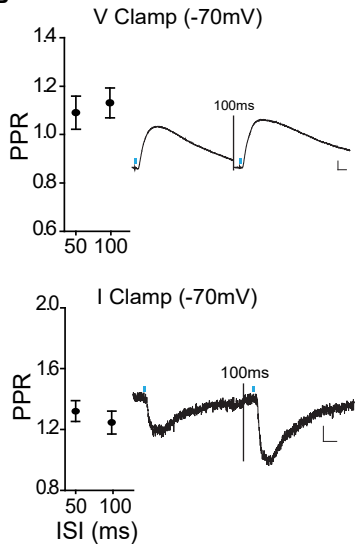**C**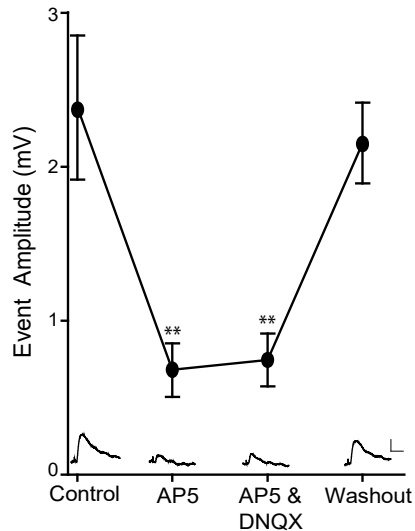



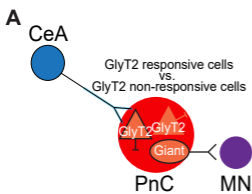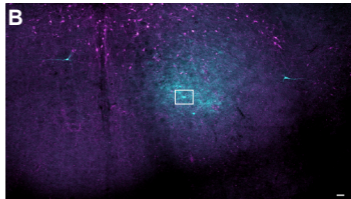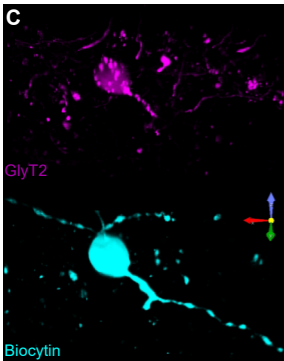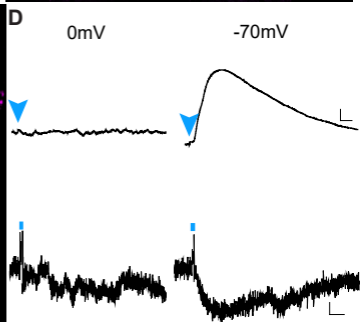

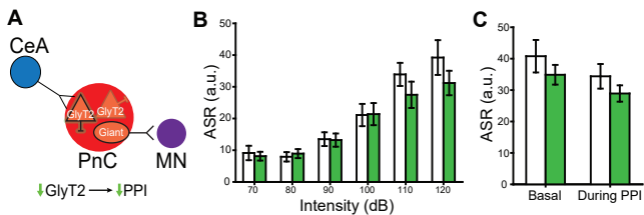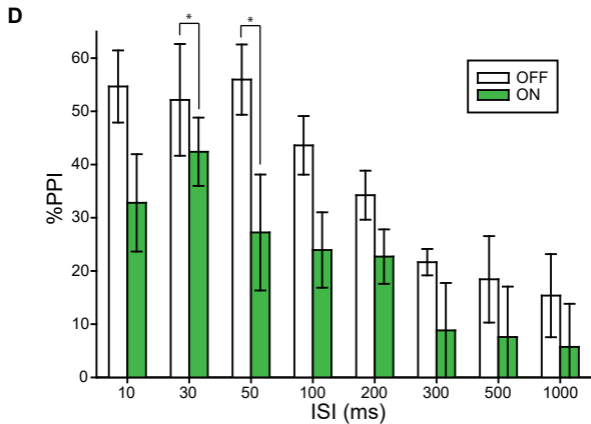

Source: https://www.biorxiv.org/content/10.1101/2021.01.24.427973v1.full.pdf
